# Supplementary material for: Media Coverage of the Benefits and Harms of Testing the Healthy: a protocol for a descriptive study
Source: PubMed Central journal article supplement — BMJ Open. 2019 Aug 24;9(8):e029532. doi: 10.1136/bmjopen-2019-029532 (PMC6721653; doi:10.1136/bmjopen-2019-029532), 2019-08-24
Supplement: bmjopen-2019-029532.draft_revisions.pdf [file bmjopen-2019-029532.draft_revisions.pdf]

# BMJ Open

BMJ Open is committed to open peer review. As part of this commitment we make the peer review history of every article we publish publicly available.

When an article is published we post the peer reviewers' comments and the authors' responses online. We also post the versions of the paper that were used during peer review. These are the versions that the peer review comments apply to.

The versions of the paper that follow are the versions that were submitted during the peer review process. They are not the versions of record or the final published versions. They should not be cited or distributed as the published version of this manuscript.

BMJ Open is an open access journal and the full, final, typeset and author-corrected version of record of the manuscript is available on our site with no access controls, subscription charges or pay-per-view fees (<http://bmjopen.bmj.com>).

If you have any questions on BMJ Open's open peer review process please email [info.bmjopen@bmj.com](mailto:info.bmjopen@bmj.com)

# BMJ Open

## Media coverage of the benefits and harms of testing the healthy: a protocol for a descriptive study

|                               |                                                                                                                                                                                                                                                                                                                                                                                                                                                                                                                                                                                                                                                                                     |
|-------------------------------|-------------------------------------------------------------------------------------------------------------------------------------------------------------------------------------------------------------------------------------------------------------------------------------------------------------------------------------------------------------------------------------------------------------------------------------------------------------------------------------------------------------------------------------------------------------------------------------------------------------------------------------------------------------------------------------|
| Journal:                      | <i>BMJ Open</i>                                                                                                                                                                                                                                                                                                                                                                                                                                                                                                                                                                                                                                                                     |
| Manuscript ID                 | bmjopen-2019-029532                                                                                                                                                                                                                                                                                                                                                                                                                                                                                                                                                                                                                                                                 |
| Article Type:                 | Protocol                                                                                                                                                                                                                                                                                                                                                                                                                                                                                                                                                                                                                                                                            |
| Date Submitted by the Author: | 30-Jan-2019                                                                                                                                                                                                                                                                                                                                                                                                                                                                                                                                                                                                                                                                         |
| Complete List of Authors:     | O'Keeffe, Mary; University of Sydney, Sydney School of Public Health, Faculty of Health and Medicine; Institute for Musculoskeletal Health , Barratt, Alexandra; University of Sydney, School of Public Health<br>Maher, Christopher; The University of Sydney, Sydney School of Public Health, Faculty of Health and Medicine; Institute for Musculoskeletal Health<br>Zadro, Joshua; University of Sydney, Institute for Musculoskeletal Health, School of Public Health<br>Fabbri, Alice; University of Sydney , Charles Perkins Centre and School of Pharmacy, Faculty of Medicine and Health<br>Moynihan, Ray; Bond University, Centre for Research in Evidence Based Practice |
| Keywords:                     | testing the healthy, media coverage, benefits, harms, overdiagnosis                                                                                                                                                                                                                                                                                                                                                                                                                                                                                                                                                                                                                 |
|                               |                                                                                                                                                                                                                                                                                                                                                                                                                                                                                                                                                                                                                                                                                     |

SCHOLARONE™  
Manuscripts

1  
2  
3 **Media coverage of the benefits and harms of testing the healthy: a protocol for a**  
4 **descriptive study**  
5  
6

7 Mary O’Keeffe<sup>1,2</sup> Email: [Mary.OKeeffe@sydney.edu.au](mailto:Mary.OKeeffe@sydney.edu.au)

8 Alexandra Barratt<sup>1</sup> Email: [Alexandra.Barratt@sydney.edu.au](mailto:Alexandra.Barratt@sydney.edu.au)

9 Chris G.Maher<sup>1,2</sup> Email: [Christopher.Maher@sydney.edu.au](mailto:Christopher.Maher@sydney.edu.au)

10 Joshua R. Zadro<sup>1,2</sup> Email: [Joshua.Zadro@sydney.edu.au](mailto:Joshua.Zadro@sydney.edu.au)

11 Alice Fabbri<sup>3</sup> Email: [Alice.Fabbri@sydney.edu.au](mailto:Alice.Fabbri@sydney.edu.au)

12 Ray Moynihan<sup>1,4</sup> Email: [Rmoyniha@bond.edu.au](mailto:Rmoyniha@bond.edu.au)  
13  
14  
15

16 <sup>1</sup>Sydney School of Public Health, Faculty of Medicine and Health, University of Sydney,  
17 Sydney, Australia.

18 <sup>2</sup> Institute for Musculoskeletal Health, Sydney, Australia.

19 <sup>3</sup> Charles Perkins Centre and School of Pharmacy, Faculty of Medicine and Health, University  
20 of Sydney, Sydney, Australia.  
21

22 <sup>4</sup> Centre for Research in Evidence Based Practice, Bond University, Queensland, Australia.  
23  
24  
25  
26

27 **Corresponding author:**  
28

29 Mary O’Keeffe, PhD

30 Sydney School of Public Health, Faculty of Medicine and Health, University of Sydney,  
31 Sydney, Australia

32 E: [Mary.OKeeffe@sydney.edu.au](mailto:Mary.OKeeffe@sydney.edu.au)

33 T: +612 8627 6856  
34  
35  
36  
37

38 **Word count:** 2585  
39  
40  
41  
42  
43  
44  
45  
46  
47  
48  
49  
50  
51  
52  
53  
54  
55  
56  
57  
58  
59  
60

## Abstract

**Introduction** Much testing in medicine is aimed at healthy people to facilitate the early detection of health conditions. However, there is growing evidence that early detection is a double-edged sword that may cause harm in the form of overdiagnosis. The media can be seen as a major generator of consumer demand for health services. Previous research shows that media coverage tends to overstate the benefits and downplay the harms of medical interventions for the sick, and often fails to cover relevant conflicts of interest of those promoting those interventions. However, little is known about how the benefits and harms of testing the healthy are covered by media.

**Objective** To examine media coverage of the benefits and harms of testing the healthy, and coverage of potential conflicts of interest of those promoting the testing.

**Methods and analysis** We will examine five tests: 3D mammography for the early detection of breast cancer; blood liquid biopsy for the early detection of cancer; blood biomarkers tests for early detection of dementia; artificial intelligence technology for the early detection of dementia; and the Apple Watch Series 4 electrocardiogram sensor for detection of atrial fibrillation. We will identify media coverage using the LexisNexis and ProQuest electronic databases. Sets of two independent reviewers will conduct story screening and coding. We will include English language media stories referring to any of the five tests from January 2016 to January 2019. We will include media stories if they refer to any benefits or harms of the screening test for our conditions of interest. Descriptive statistics will be used in the analysis.

**Ethics and dissemination** No ethical approval is required for this study. Results will be presented at relevant scientific conferences and in peer-reviewed literature.

**Funding** No funding is required for this study.

**Keywords:** testing the healthy, media coverage, benefits, harms, overdiagnosis

### Strengths and limitations of this study

- This will be the first study to analyse the media coverage of the benefits and harms of tests that have the potential for overdiagnosis in healthy people.
- Media stories will not be restricted by country.
- The results could inform interventions to improve the quality of medical reporting in the media.
- The study will only consider media coverage of five tests.

1  
2  
3  
4  
5  
6  
7  
8  
9  
10  
11  
12  
13  
14  
15  
16  
17  
18  
19  
20  
21  
22  
23  
24  
25  
26  
27  
28  
29  
30  
31  
32  
33  
34  
35  
36  
37  
38  
39  
40  
41  
42  
43  
44  
45  
46  
47  
48  
49  
50  
51  
52  
53  
54  
55  
56  
57  
58  
59  
60

For peer review only

## Introduction

Much testing in medicine is aimed at apparently healthy people to identify those at an increased risk of a disease or disorder.<sup>1</sup> These ‘healthy’ people can subsequently be offered more tests, treatment(s), or preventive strategies (e.g. a preventive medicine).<sup>1</sup> The increasing popularity of testing is indicative of recent enthusiasm for early detection, which is part of the promise of ‘precision medicine’. That is, early detection is always better, and treatment is more effective when it is tailored to the individual.<sup>2</sup> Apparently healthy or well people are increasingly encouraged to proactively monitor, and be vigilant about understanding their health, with testing seen as a positive step in consumer health empowerment. However, there is mounting evidence that testing can harm healthy people, and the quest for ever-earlier detection of disease can lead to unnecessary classification of the healthy as sick: overdiagnosis.<sup>2-7</sup>

Overdiagnosis occurs when people receive a diagnosis that does more harm than good<sup>8</sup>; for example, when healthy people are labelled with, or treated for, a disease that would never cause them harm.<sup>4 5 9 10</sup> A key driver of overdiagnosis is the use of more sensitive tests which can detect smaller abnormalities, many of which are benign.<sup>11</sup> There is growing evidence demonstrating the presence of overdiagnosis, often arising through testing healthy people, across different areas of medicine. Examples include screening for cancer (e.g. breast, prostate, thyroid), cardiovascular disease, and dementia.<sup>6 7 12-16</sup> Inappropriate screening in this context is likely to lead to higher healthcare spending and worse outcomes (e.g. psychological effects and unnecessary and harmful treatments).<sup>17-21</sup>

There is a concern that people may not be knowledgeable about the potential harms of getting tested when healthy. In fact, research has shown that only a small proportion of people are knowledgeable about overdiagnosis. This includes individuals offered tests where the potential for overdiagnosis is high.<sup>22 23</sup> Both clinicians and patients overestimate the benefits of testing, while underestimating the harms.<sup>24 25</sup> Sustained promotion to the public and patients of the importance of early detection and testing, including via the media, is considered another driver of overdiagnosis.<sup>11</sup>

There has been widespread scientific interest in media reporting of medical interventions. There is also concern about how changing media environments, such as the rising influence of social media, can lead to “junk-food news”.<sup>26</sup> Indeed, previous studies on the media have identified evidence of exaggeration,<sup>27 28</sup> inaccurate media coverage of published scientific papers,<sup>29 30</sup> overstating of benefits of treatments, downplaying of harms,<sup>27 29</sup> and failure to report important conflicts of interest of the experts cited in the story.<sup>27</sup> Concern has also been expressed about the financial closeness between journalists and industry. For example, pharmaceutical industry-funding of journalism practice, awards, and education, have been documented.<sup>31 32</sup> Further, there appears to be a lack of independent medical research commentators in the media. Only one in six media reports of research published in high impact medical journals included comments from people who were independent of the study investigators.<sup>33</sup> Moreover, one in three of the independent commenters had financial conflicts of interest, most of which were not disclosed in the media stories.

Poor media coverage of medicine is not an insignificant issue; it can influence how the public perceives the risk of health services and how patients make treatment decisions.<sup>29 31</sup> For

1  
2  
3 example, media coverage about the celebrity Kylie Minogue's self-referral mammogram  
4 bookings led to a 20-fold increase in media coverage about breast cancer and a 40% increase  
5 in mammogram bookings during the 2-week peak after the interview.<sup>34</sup> Six weeks later media  
6 coverage was still up by 30%.  
7

8  
9 While biased media reporting has been identified as one potential driver of  
10 overdiagnosis,<sup>11</sup> there has been little formal, rigorous evaluation of the media's coverage of  
11 testing healthy people. An evaluation may give us an insight into how the media can contribute  
12 to overdiagnosis, and potential strategies to enhance media coverage of testing. In this study,  
13 we aim to examine the media coverage of the benefits and harms of testing the healthy, and the  
14 potential conflicts of interest of those promoting the testing, by examining the coverage of five  
15 tests.  
16  
17

## 18 19 **Methods and analysis**

### 20 **Overview**

21 We will conduct a large descriptive cross-sectional study of global English-language  
22 media coverage of five tests from January 2016 to January 2019.  
23  
24

### 25 **Tests and conditions of interest**

26 This descriptive study will focus on five tests:  
27  
28

- 29 1. 3D mammography for the early detection of breast cancer.
- 30 2. Blood liquid biopsy tests for the early detection of cancer(s)
- 31 3. Blood biomarker tests for the early detection of dementia
- 32 4. Artificial intelligence (AI) technology for the early detection of dementia
- 33 5. Apple Watch Series 4 electrocardiogram (ECG) sensor for detection of atrial fibrillation  
34 (AFib)  
35  
36  
37  
38

39 We identified these tests based on the following criteria:  
40

- 41 1. Evidence based concerns about overdiagnosis.
- 42 2. Evidence of Food and Drug Administration (FDA) approval for certain classes of each  
43 test.  
44
- 45 3. Concern that the results of these tests will not guide treatment decisions; either due to  
46 the unavailability of effective treatment options (e.g. dementia) or treatments that may  
47 cause more harm than benefit (e.g. early mammography)
- 48 4. Identifiable groups or companies with a financial interest in promoting these tests, or  
49 maximising the markets for downstream treatments.  
50
- 51 5. Notable media coverage.  
52  
53  
54

55 One reviewer (MOK) tracked media coverage of tests for the healthy between April  
56 2018 and October 2018. Results were recorded in an excel file. Based on these results, the same  
57 reviewer designed a series of google alerts (running between April 2018 and December 2018)  
58 with specific keywords related to testing. The alert results were screened to identify media  
59 coverage on tests for healthy people which met the first four criteria mentioned above.  
60

1  
2  
3 Consideration was given to conducting a descriptive study of a random sample of recent media  
4 coverage for all tests. However, we felt that tracking a limited number of tests over time would  
5 give us a more comprehensive picture of how the harms and benefits of testing were reported  
6 in the media over time. Five tests that were receiving notable media coverage were included.  
7 Below we provide details of five identified tests.  
8  
9

### 10 11 12 13 **1. 3D Mammography for the early detection of breast cancer**

14 3D mammography or digital breast tomosynthesis (DBT) is an advancement on traditional  
15 mammography. Many companies have received FDA approval for 3D mammography,<sup>35-37</sup>  
16 partially based on an emerging body of evidence on its detection capability relative to 2D  
17 mammography screening.<sup>38</sup>

18  
19 There is a high level of uncertainty surrounding the benefits of 3D mammography. For  
20 example, a systematic review and meta-analysis<sup>39</sup> found that 3D mammography improves  
21 cancer detection rate and reduces recall for assessment compared to traditional mammography.  
22 However, these improvements varied by setting; compared to retrospective studies in the  
23 United States where annual screening was encouraged, there were greater improvements  
24 observed in prospective studies embedded in the European biennial screening programs.  
25

26  
27 There is a large amount of research on the benefits and harms of mammography,  
28 particularly compared to the other four tests we selected. Overdiagnosis is a significant harm  
29 of screening mammography, and notwithstanding uncertainty in the data, there are estimates  
30 of its frequency ranging between 10 and 50% of screen-detected cancers.<sup>12 40</sup> Overdiagnosis of  
31 breast cancer can lead to unnecessary surgery, radiotherapy and endocrine therapies, as these  
32 are standard treatments for women with screen-detected cancers.<sup>12 20 40</sup> These treatments cause  
33 harm through physical and psychological effects that can impact on quality of life.<sup>18</sup> Overall,  
34 little is known about whether the improved cancer detection rate estimated for 3D  
35 mammography screening – compared with 2D mammography screening – will have additional  
36 benefit (ie, whether it will further reduce breast cancer mortality) or whether it will lead to  
37 harms (e.g overdiagnosis), or a combination of both.  
38  
39  
40  
41  
42

### 43 **2. Liquid biopsy for the early detection of cancer**

44 A liquid biopsy is a blood test using genomic profiling to detect mutations or cancer cells  
45 (circulating tumour DNA cells).<sup>41</sup> The FDA approved the first liquid biopsy in 2016.<sup>42</sup> This  
46 class of liquid biopsy was designed for clinicians to monitor cancer status and patient response  
47 to treatment. The FDA has since (April 2018) approved another liquid biopsy test by a  
48 molecular information company called Foundation Medicine.<sup>43</sup>

49  
50 There is a lot of uncertainty surrounding the effectiveness of liquid biopsy for both early  
51 detection, and improvement of cancer treatment.<sup>44</sup> There are also concerns that the detection  
52 of circulating tumour DNA cells in asymptomatic populations could lead to overdiagnosis.<sup>45</sup>  
53  
54  
55  
56  
57  
58  
59  
60



### 3. *Blood biomarker tests for the early detection of dementia*

There is enormous interest in identifying a cheap and simple test to detect dementia in the early stages, with the hope this will improve the treatment of dementia. In recent years there has been particular interest in blood tests to detect abnormal levels of two proteins: amyloid beta and tau.<sup>46 47</sup> Both are considered biomarkers of dementia.<sup>46</sup> The FDA granted approval to a genetic company called '23andMe' in 2017 to offer direct to consumer tests for the early detection of dementia.<sup>48</sup> The decision has generated controversy with commentators concerned about what they see as a lack of robust evidence to support the testing in the early detection of dementia, concerns about overdiagnosis,<sup>49</sup> and the implications of testing a condition that has not yet been shown to be amenable to intervention.<sup>47 49 50</sup>

### 4. *Artificial intelligence technology for the early detection of dementia*

Similarly to blood tests, there is a keen interest in using artificial intelligence (AI) technology to improve the early detection of dementia. AI refers to the use of machine algorithms (e.g. computer programmes) to model intelligent behaviour with minimal human intervention.<sup>51</sup> The FDA has now approved one type of AI technology to monitor brain structures in different neurological conditions, including dementia.<sup>52</sup> Since February 2018, the FDA have also relaxed regulatory policies on drugs for dementia so they could approve the delivery of disease treatments to people displaying certain biological signals years before the disease shows outward signs. AI technology has been proposed as a key step in detecting these subtle biological signals of dementia (e.g. small changes in brain size, metabolic changes, memory recognition, voice recognition etc.). Researchers have expressed concerns about the lack of robust clinical research in this area, and the potential of AI to lead to false positives, and overdiagnosis.<sup>53</sup>

### 5. *Apple Watch series 4 ECG sensor for the early detection of atrial fibrillation*

The Apple Watch Series 4 was released in 2018. It features an electrocardiogram (ECG) sensor that has received FDA medical device approval.<sup>54</sup> The primary rationale for this new sensor is to facilitate the early detection of atrial fibrillation (AFib). AFib is the most common heart arrhythmia (irregular heartbeat), and is associated with increased mortality, heart failure, and a higher risk of stroke.<sup>55-57</sup> Because of this, a diagnosis of AFib can often lead to drug therapy and in some cases, surgery.<sup>56</sup> The Apple ECG sensor records electrical impulses patterns of a person's heart to predict AFib. The sensor will inform the user of the presence of AFib and advise on the need for medical consultation. Researchers have expressed concern that the liberal use of testing for AFib may lead to false positives and overdiagnosis.<sup>58</sup> These concerns have also been echoed by some medical commentators, who think it is only a matter of time before ECG watches, like the Apple watch, lead to overdiagnosis.<sup>59</sup>

### **Search strategy**

We will identify all relevant English-language media stories by searching the LexisNexis and ProQuest electronic databases, using explicit keywords, from January 2016 to January 2019. Different keywords will be required for each of the five tests; therefore 5 searches (one specific to each test) will be performed. This date range aligns with our five justifications provided earlier, and the emergence of the five targeted tests. A librarian/information specialist with

1  
2  
3 expertise in systematic review search design will assist with the search strategy. We will not  
4 restrict articles by country. We will define “media coverage” to include traditional print, online,  
5 television, and radio news media, news blogs, and comment and opinion pieces.  
6  
7

### 8 **Inclusion and exclusion criteria**

9 We will include media stories referring to any of our five target tests for the corresponding  
10 conditions of interest. Media stories will be included if they refer to any benefits (e.g. early  
11 detection of the condition, early treatment of the condition, prevention of the condition) or  
12 harms of the test (e.g. overdiagnosis, misdiagnosis, inappropriate treatment, overtreatment). We  
13 will exclude media stories that only focus on tests for symptomatic people or people who  
14 already have the condition of interest (e.g. mammography for monitoring the progression of  
15 breast cancer), media stories about patent approval or business issues only, press releases, and  
16 scientific journal reports. We will first pilot our screening process. Depending on the results of  
17 the pilot, we may add additional criteria, or provide more detail on the current inclusion and  
18 exclusion criteria.  
19  
20  
21  
22  
23  
24  
25

### 26 **Screening process**

27 Sets of two independent reviewers will be involved in performing the screening of media  
28 stories for each test. We will exclude exact duplicates (same title, same outlet, and same date)  
29 before starting the screening and will keep track of the number of duplicates. Reviewers will  
30 independently assess the eligibility of media reports for potential inclusion according to the  
31 predefined selection criteria. Any disagreements in judgement will be resolved by discussion  
32 to reach consensus or by consultation with another author (RM). We will also exclude, but  
33 keep track of, syndicated media stories. These are a subset of media studies where the same  
34 story has been run across multiple media outlets.  
35  
36  
37  
38  
39

### 40 **Data extraction and coding**

41 We will use a structured template to extract and code the relevant data in Research Electronic  
42 Data Capture (REDCap) hosted at The University of Sydney.<sup>60</sup> The data extraction tool will be  
43 adapted from tools used in similar studies<sup>27 61 62</sup> and an iterative design process will be used to  
44 refine the tool for the purpose of our study. Before formal data extraction and coding, a number  
45 of reviewers will independently apply the data extraction tool to code 20 media stories; four  
46 for each test. Disagreements in data extraction and coding will be resolved by discussion and  
47 subsequent revisions to the data extraction tool. We plan to extract information about the media  
48 story (e.g. type of media, test mentioned, country of origin), benefits mentioned, harms  
49 mentioned, disclosure of conflicts of interest, and the overall tone of the story (positive or  
50 negative).  
51  
52  
53  
54  
55  
56

### 57 **Data analysis**

58 Descriptive statistics (e.g. means, standard deviations (SD), counts and percentages) will be  
59 used to summarise the extracted data and will be performed separately for each test (e.g. number  
60

1  
2  
3 of stories, number of countries, number reporting benefits and harms, etc). We will analyse  
4 differences in characteristics of media reports across the five different tests (e.g amount of  
5 media coverage, differences in the reporting of benefits, harms, conflicts of interest) and  
6 whether these characteristics change over time (from 2016 to 2019). We will also outline at  
7 least one example of a media story for each test in the results section.  
8  
9

### 10 **Ethical considerations**

11  
12  
13 No ethical approval is required for this study.  
14

### 15 **Patient or Public Involvement**

16  
17 Patients and members of the public were not involved in the design of this study.  
18

### 19 **Dissemination**

20  
21 The results of this study will be published and presented at relevant medical conferences. We  
22 anticipate the results of this study will inform the development of an intervention to improve  
23 the quality of medical reporting in the media.  
24  
25

### 26 **Discussion and Conclusion**

27  
28 This study will examine media coverage reporting the benefits and harms of five medical tests  
29 that are controversially being promoted to the healthy. The results will provide valuable  
30 information about the quality of media reporting on tests targeting the healthy, and inform  
31 interventions to improve the quality of medical reporting.  
32  
33  
34  
35  
36  
37  
38  
39  
40  
41  
42  
43  
44  
45  
46  
47  
48  
49  
50  
51  
52  
53  
54  
55  
56  
57  
58  
59  
60

1  
2  
3 **Acknowledgement:** We would like to thank Professor Andrew D. Oxman (Centre for  
4 Informed Health Choices, Norwegian Institute of Public Health, Oslo, Norway and University  
5 of Oslo, Oslo, Norway) for providing feedback on an earlier draft of this protocol.  
6  
7

8 **Authors' contributions:** MOK, RM and AB have been primarily responsible for study  
9 conception, design, designing the data coding approach, and plans for analysis. JZ and AF  
10 helped pilot the search strategy and coding tool. MOK drafted the first version of this  
11 manuscript. All authors provided critical evaluation and revision of the manuscript and had  
12 given final approval of the manuscript accepting responsibility for all aspects.  
13  
14

15 **Funding statement:** MOK is supported by a European Union Marie Skłodowska-Curie  
16 postdoctoral fellowship. AB and RM are investigators on a National Health and Medical  
17 Research Council of Australia (NHMRC) funded CRE grant No.1104136. RM is supported by  
18 an NHMRC grant, #1124207. AF is a post-doctoral fellow on an Australian NHMRC project  
19 grant no.1122332. CGM is supported by an Australian NMHRC Research Fellowship. This  
20 specific study received no specific grant from any funding agency in public, commercial or  
21 not-for-profit sectors.  
22  
23  
24  
25

26 **Competing interests statement:** None to declare  
27  
28  
29  
30  
31  
32  
33  
34  
35  
36  
37  
38  
39  
40  
41  
42  
43  
44  
45  
46  
47  
48  
49  
50  
51  
52  
53  
54  
55  
56  
57  
58  
59  
60

## References:

1. Grimes DA, Schulz KF. Uses and abuses of screening tests. *The Lancet* 2002;359(9309):881-84.
2. Hunt S, Jha S. Can precision medicine reduce overdiagnosis? *Academic radiology* 2015;22(8):1040-1.
3. Brodersen J, Kramer BS, Macdonald H, et al. Focusing on overdiagnosis as a driver of too much medicine. *BMJ* 2018;362:k3494.
4. Moynihan R, Doust J, Henry D. Preventing Overdiagnosis: how to stop harming the healthy. *BMJ* 2015;344:e3502.
5. Glasziou P, Moynihan R, Richards T, et al. Too much medicine; too little care. *BMJ* 2013;347:f4247.
6. Ahn HS, Kim HJ, Welch HG. Korea's thyroid-cancer "epidemic"—screening and overdiagnosis. *N Engl J Med* 2014;371(19):1765-67.
7. Vaccarella S, Franceschi S, Bray F, et al. Worldwide thyroid-cancer epidemic? The increasing impact of overdiagnosis. *N Engl J Med* 2016;375(7):614-17.
8. Carter SM, Rogers W, Heath I, et al. The challenge of overdiagnosis begins with its definition. *BMJ* 2015;350:h869.
9. Moynihan R, Henry D, Moons KG. Using evidence to combat overdiagnosis and overtreatment: evaluating treatments, tests, and disease definitions in the time of too much. *PLoS Med* 2014;11(7):e1001655.
10. Moynihan R, Glasziou P, Woloshin S, et al. Winding back the harms of too much medicine. *BMJ* 2013;346:f1271.
11. Pathirana T, Clark J, Moynihan R. Mapping the drivers of overdiagnosis to potential solutions. *BMJ* 2017;358:j3879.
12. Welch HG, Prorok PC, O'Malley AJ, et al. Breast-cancer tumor size, overdiagnosis, and mammography screening effectiveness. *N Engl J Med* 2016;375(15):1438-47.
13. Etzioni R, Penson DF, Legler JM, et al. Overdiagnosis due to prostate-specific antigen screening: lessons from US prostate cancer incidence trends. *J Natl Cancer Inst* 2002;94(13):981-90.
14. Bell KJ, Del Mar C, Wright G, et al. Prevalence of incidental prostate cancer: A systematic review of autopsy studies. *Int J Cancer* 2015;137(7):1749-57.
15. Niemantsverdriet E, Feyen BF, Le Bastard N, et al. Overdiagnosing vascular dementia using structural brain imaging for dementia work-up. *J Alzheimers Dis* 2015;45(4):1039-43.
16. Schmidt T, Maag R, Foy AJ. Overdiagnosis of coronary artery disease detected by coronary computed tomography angiography: a teachable moment. *JAMA Intern Med* 2016;176(12):1747-48.
17. Cotter AR, Vuong K, Mustelin LL, et al. Do psychological harms result from being labelled with an unexpected diagnosis of abdominal aortic aneurysm or prostate cancer through screening? A systematic review. *BMJ Open* 2017;7(12):e017565.
18. Nelson HD, Pappas M, Cantor A, et al. Harms of breast cancer screening: systematic review to update the 2009 US Preventive Services Task Force Recommendation. *Ann Intern Med* 2016;164(4):256-67.
19. DeFrank JT, Barclay C, Sheridan S, et al. The psychological harms of screening: the evidence we have versus the evidence we need. *J Gen Intern Med* 2015;30(2):242-48.

20. Welch HG, Passow HJ. Quantifying the benefits and harms of screening mammography. *JAMA Intern Med* 2014;174(3):448-54.
21. Prasad V, Lenzer J, Newman DH. Why cancer screening has never been shown to “save lives”—and what we can do about it. *BMJ* 2016;352:h6080.
22. Moynihan R, Nickel B, Hersch J, et al. Public opinions about overdiagnosis: a national community survey. *PLoS One* 2015;10(5):e0125165.
23. Ghanouni A, Meisel SF, Renzi C, et al. Survey of public definitions of the term ‘overdiagnosis’ in the UK. *BMJ Open* 2016;6(4)
24. Hoffmann TC, Del Mar C. Patients’ expectations of the benefits and harms of treatments, screening, and tests: a systematic review. *JAMA Intern Med* 2015;175(2):274-86.
25. Hoffmann TC, Del Mar C. Clinicians’ expectations of the benefits and harms of treatments, screening, and tests: a systematic review. *JAMA Intern Med* 2017;177(3):407-19.
26. Medew J, Moynihan R. Improving coverage of medical research in a changing media environment. *CMAJ* 2017;189(15):E551.
27. Moynihan R, Bero L, Ross-Degnan D, et al. Coverage by the news media of the benefits and risks of medications. *N Engl J Med* 2000;342(22):1645-50.
28. Cassels A, Hughes MA, Cole C, et al. Drugs in the news: an analysis of Canadian newspaper coverage of new prescription drugs. *CMAJ* 2003;168(9):1133-37.
29. Goldacre B. Preventing bad reporting on health research. *BMJ* 2014;349:g7465.
30. Almomani B, Hawwa AF, Goodfellow NA, et al. Pharmacogenetics and the print media: what is the public told? *BMC Med Genet* 2015;16(1):32.
31. Schwartz LM, Woloshin S, Moynihan R. Who's watching the watchdogs? *BMJ* 2008;337(9):a2535.
32. Moynihan R. Making medical journalism healthier. *The Lancet* 2003;361(9375):2097-98.
33. Wang MT, Grey A, Bolland MJ. Conflicts of interest and expertise of independent commenters in news stories about medical research. *CMAJ* 2017;189(15):E553-E59.
34. Chapman S, McLeod K, Wakefield M, et al. Impact of news of celebrity illness on breast cancer screening: Kylie Minogue's breast cancer diagnosis. *Med J Aust* 2005;183(5):247-50.
35. Hologic I. FDA Approves Hologic's Genius™ 3D Mammography™ Exam as the Only Mammogram Superior for Women with Dense Breasts\* 2017 [Available from: <https://www.prnewswire.com/news-releases/fda-approves-hologics-genius-3d-mammography-exam-as-the-only-mammogram-superior-for-women-with-dense-breasts-300469885.html>].
36. Healio. FDA approves 3-D mammography system 2011 [Available from: <https://www.healio.com/hematology-oncology/breast-cancer/news/print/hemonc-today/%7Ba61b1afa-4238-4b58-8f6a-f9298833f19b%7D/fda-approves-3-d-mammography-system>].
37. News IT. FDA Approves New Imaging Features on Hologic 3Dimensions Mammography System. 2018
38. Zackrisson S, Lång K, Rosso A, et al. One-view breast tomosynthesis versus two-view mammography in the Malmö Breast Tomosynthesis Screening Trial (MBTST): a prospective, population-based, diagnostic accuracy study. *Lancet Oncol* 2018;19(11):1493-503.
39. Marinovich ML, Hunter KE, Macaskill P, et al. Breast Cancer Screening Using Tomosynthesis or Mammography: A Meta-analysis of Cancer Detection and Recall. *J Natl Cancer Inst* 2018;110(9):942-49.
40. Barratt AL, Glasziou PP. Do the benefits of screening mammography outweigh the harms of overdiagnosis and unnecessary treatment? *Med J Aust* 2012;196(11):681.

- 1
- 2
- 3
- 4 41. Crowley E, Di Nicolantonio F, Loupakis F, et al. Liquid biopsy: monitoring cancer-
- 5 genetics in the blood. *Nat Rev Clin Oncol* 2013;10(8):472.
- 6 42. US Food and Drug Administration (FDA). FDA approves first blood test to detect gene
- 7 mutation associated with non-small cell lung cancer 2016 [Available from:
- 8 <https://www.fda.gov/newsevents/newsroom/pressannouncements/ucm504488.htm>.
- 9 43. Medicine F. Foundation Medicine's New Liquid Biopsy Assay Granted Breakthrough
- 10 Device Designation by U.S. Food and Drug Administration 2018 [Available from:
- 11 [http://investors.foundationmedicine.com/news-releases/news-release-](http://investors.foundationmedicine.com/news-releases/news-release-details/foundation-medicines-new-liquid-biopsy-assay-granted)
- 12 [details/foundation-medicines-new-liquid-biopsy-assay-granted](http://investors.foundationmedicine.com/news-releases/news-release-details/foundation-medicines-new-liquid-biopsy-assay-granted).
- 13 44. Merker JD, Oxnard GR, Compton C, et al. Circulating Tumor DNA Analysis in Patients
- 14 With Cancer: American Society of Clinical Oncology and College of American
- 15 Pathologists Joint Review. *J Clin Oncol* 2018;36(16):1631-41.
- 16 45. Palmirotta R, Lovero D, Cafforio P, et al. Liquid biopsy of cancer: a multimodal
- 17 diagnostic tool in clinical oncology. *Ther Adv Med Oncol*
- 18 2018;10:1758835918794630-30.
- 19 46. Ritchie C, Smailagic N, Noel-Storr AH, et al. CSF tau and the CSF tau/ABeta ratio for
- 20 the diagnosis of Alzheimer's disease dementia and other dementias in people with
- 21 mild cognitive impairment (MCI). *Cochrane Database Syst Rev* 2017;3:CD010803.
- 22 47. Chambers LW, Sivananthan S, Brayne C. Is Dementia Screening of Apparently Healthy
- 23 Individuals Justified? *Adv Prev Med* 2017
- 24 48. 23andMe I. 23andMe, Inc. Granted First FDA Authorization to Market Direct-to-
- 25 Consumer Genetic Health Risk Reports 2017 [Available from:
- 26 [https://mediacenter.23andme.com/press-releases/23andme-inc-granted-first-fda-](https://mediacenter.23andme.com/press-releases/23andme-inc-granted-first-fda-authorization-market-direct-consumer-genetic-health-risk-reports/)
- 27 [authorization-market-direct-consumer-genetic-health-risk-reports/](https://mediacenter.23andme.com/press-releases/23andme-inc-granted-first-fda-authorization-market-direct-consumer-genetic-health-risk-reports/).
- 28 49. McCleery J, Flicker L, Richard E, et al. The National Institute on Aging and Alzheimer's
- 29 Association research framework: A commentary from the Cochrane Dementia and
- 30 Cognitive Improvement Group. *Alzheimers Dement* 2019;15(1):179-81.
- 31 50. Brunet M. Targets for dementia diagnoses will lead to overdiagnosis. *BMJ*
- 32 2014;348:g2224.
- 33 51. Verghese A, Shah NH, Harrington RA. What this computer needs is a physician:
- 34 humanism and artificial intelligence. *JAMA* 2018;319(1):19-20.
- 35 52. Icometrix. FDA clears icometrix' image quantification software to monitor neurological
- 36 disorders 2016 [Available from: [https://www.prnewswire.com/news-releases/fda-](https://www.prnewswire.com/news-releases/fda-clears-icometrix-image-quantification-software-to-monitor-neurological-disorders-300322995.html)
- 37 [clears-icometrix-image-quantification-software-to-monitor-neurological-disorders-](https://www.prnewswire.com/news-releases/fda-clears-icometrix-image-quantification-software-to-monitor-neurological-disorders-300322995.html)
- 38 [300322995.html](https://www.prnewswire.com/news-releases/fda-clears-icometrix-image-quantification-software-to-monitor-neurological-disorders-300322995.html).
- 39 53. Komorowski M, Celi LA. Will Artificial Intelligence Contribute to Overuse in
- 40 Healthcare? *Crit Care Med* 2017;45(5):912-13.
- 41 54. Owen M. Apple Watch Series 4 is first consumer device to receive FDA clearance for
- 42 ECG monitoring 2018 [Available from:
- 43 [https://appleinsider.com/articles/18/09/12/apple-watch-series-4-is-first-consumer-](https://appleinsider.com/articles/18/09/12/apple-watch-series-4-is-first-consumer-device-to-receive-fda-clearance-for-ecg-monitoring)
- 44 [device-to-receive-fda-clearance-for-ecg-monitoring](https://appleinsider.com/articles/18/09/12/apple-watch-series-4-is-first-consumer-device-to-receive-fda-clearance-for-ecg-monitoring).
- 45 55. Go AS, Reynolds K, Yang J, et al. Association of burden of atrial fibrillation with risk of
- 46 ischemic stroke in adults with paroxysmal atrial fibrillation: The kp-rhythm study.
- 47 *JAMA Cardiol* 2018;3(7):601-08.
- 48 56. Brieger D, Amerena J, Attia J, et al. National Heart Foundation of Australia and the
- 49 Cardiac Society of Australia and New Zealand: Australian Clinical Guidelines for the
- 50 Diagnosis and Management of Atrial Fibrillation 2018. *Heart Lung Circ*
- 51 2018;27(10):1209-66.
- 52
- 53
- 54
- 55
- 56
- 57
- 58
- 59
- 60

- 1  
2  
3 57. Chen LY, Chung MK, Allen LA, et al. Atrial fibrillation burden: moving beyond atrial  
4 fibrillation as a binary entity: a scientific statement from the American Heart  
5 Association. *Circulation* 2018;137(20):e623-e44.  
6  
7 58. McCartney M. Margaret McCartney: If screening is worth doing, it's worth doing well.  
8 *BMJ* 2018;362:k2986.  
9  
10 59. Mandrola J. Overdiagnosis Only a Matter of Time With ECG Watches 2017 [Available  
11 from: <https://www.medscape.com/viewarticle/889753>.  
12  
13 60. Harris PA, Taylor R, Thielke R, et al. Research electronic data capture (REDCap)—a  
14 metadata-driven methodology and workflow process for providing translational  
15 research informatics support. *J Biomed Inform* 2009;42(2):377-81.  
16  
17 61. Woloshin S, Schwartz LM, Dejene S, et al. Media Coverage of FDA Drug Safety  
18 Communications about Zolpidem: A Quantitative and Qualitative Analysis. *J Health*  
19 *Commun* 2017;22(5):365-72.  
20  
21 62. Moynihan R, Clark J, L A. Media coverage of the benefits and harms of the 2017  
22 expanded definition of hypertension. *JAMA Intern Med* 2018.  
23  
24  
25  
26  
27  
28  
29  
30  
31  
32  
33  
34  
35  
36  
37  
38  
39  
40  
41  
42  
43  
44  
45  
46  
47  
48  
49  
50  
51  
52  
53  
54  
55  
56  
57  
58  
59  
60



# BMJ Open

## Media coverage of the benefits and harms of testing the healthy: a protocol for a descriptive study

|                                 |                                                                                                                                                                                                                                                                                                                                                                                                                                                                                                                                         |
|---------------------------------|-----------------------------------------------------------------------------------------------------------------------------------------------------------------------------------------------------------------------------------------------------------------------------------------------------------------------------------------------------------------------------------------------------------------------------------------------------------------------------------------------------------------------------------------|
| Journal:                        | <i>BMJ Open</i>                                                                                                                                                                                                                                                                                                                                                                                                                                                                                                                         |
| Manuscript ID                   | bmjopen-2019-029532.R1                                                                                                                                                                                                                                                                                                                                                                                                                                                                                                                  |
| Article Type:                   | Protocol                                                                                                                                                                                                                                                                                                                                                                                                                                                                                                                                |
| Date Submitted by the Author:   | 09-May-2019                                                                                                                                                                                                                                                                                                                                                                                                                                                                                                                             |
| Complete List of Authors:       | O'Keeffe, Mary; The University of Sydney School of Public Health; Institute for Musculoskeletal Health ,<br>Barratt, Alexandra; The University of Sydney School of Public Health<br>Maher, Christopher; The University of Sydney School of Public Health; Institute for Musculoskeletal Health<br>Zadro, Joshua; The University of Sydney School of Public Health; Institute for Musculoskeletal Health<br>Fabbri, Alice; The University of Sydney School of Pharmacy<br>Jones, Mark; Bond University<br>Moynihan, Ray; Bond University |
| <b>Primary Subject Heading</b>: | Public health                                                                                                                                                                                                                                                                                                                                                                                                                                                                                                                           |
| Secondary Subject Heading:      | Communication                                                                                                                                                                                                                                                                                                                                                                                                                                                                                                                           |
| Keywords:                       | testing the healthy, media coverage, benefits, harms, overdiagnosis                                                                                                                                                                                                                                                                                                                                                                                                                                                                     |
|                                 |                                                                                                                                                                                                                                                                                                                                                                                                                                                                                                                                         |

SCHOLARONE™  
Manuscripts

1  
2  
3  
4 **Media coverage of the benefits and harms of testing the healthy: a protocol for a descriptive**  
5 **study**  
6  
7

8 Mary O’Keeffe<sup>1,2</sup> Email: [Mary.OKeeffe@sydney.edu.au](mailto:Mary.OKeeffe@sydney.edu.au)

9 Alexandra Barratt<sup>1</sup> Email: [Alexandra.Barratt@sydney.edu.au](mailto:Alexandra.Barratt@sydney.edu.au)

10 Christopher Maher<sup>1,2</sup> Email: [Christopher.Maher@sydney.edu.au](mailto:Christopher.Maher@sydney.edu.au)

11 Joshua R. Zadro<sup>1,2</sup> Email: [Joshua.Zadro@sydney.edu.au](mailto:Joshua.Zadro@sydney.edu.au)

12 Alice Fabbri<sup>3</sup> Email: [Alice.Fabbri@sydney.edu.au](mailto:Alice.Fabbri@sydney.edu.au)

13 Mark Jones<sup>4</sup> Email: [Majones@bond.edu.au](mailto:Majones@bond.edu.au)

14 Ray Moynihan<sup>4</sup> Email: [Rmoyniha@bond.edu.au](mailto:Rmoyniha@bond.edu.au)  
15  
16  
17  
18

19 <sup>1</sup>Sydney School of Public Health, Faculty of Medicine and Health, University of Sydney, Sydney,  
20 New South Wales, Australia.

21 <sup>2</sup> Institute for Musculoskeletal Health, Sydney, New South Wales, Australia.

22 <sup>3</sup> Charles Perkins Centre and School of Pharmacy, Faculty of Medicine and Health, University of  
23 Sydney, Sydney, New South Wales, Australia.

24 <sup>4</sup> Centre for Research in Evidence-Based Practice, Bond University, Gold Coast, Queensland,  
25 Australia.  
26  
27  
28  
29  
30

31 **Corresponding author:**  
32

33 Mary O’Keeffe, PhD

34 Sydney School of Public Health, Faculty of Medicine and Health, University of Sydney, Sydney,  
35 Australia

36 E: [Mary.OKeeffe@sydney.edu.au](mailto:Mary.OKeeffe@sydney.edu.au)

37 T: +612 8627 6856  
38  
39  
40  
41  
42  
43

44 **Word count: 3223**  
45  
46  
47  
48  
49  
50  
51  
52  
53  
54  
55  
56  
57  
58  
59  
60

## Abstract

**Introduction** Much testing in medicine is aimed at healthy people to facilitate the early detection of health conditions. However, there is growing evidence that early detection is a double-edged sword that may cause harm in the form of overdiagnosis. The media can be seen as a major generator of consumer demand for health services. Previous research shows that media coverage tends to overstate the benefits and downplay the harms of medical interventions for the sick, and often fails to cover relevant conflicts of interest of those promoting those interventions. However, little is known about how the benefits and harms of testing the healthy are covered by media. This study will examine the media coverage of the benefits and harms of testing the healthy, and coverage of potential conflicts of interest of those promoting the testing.

**Methods and analysis** We will examine five tests: 3D mammography for the early detection of breast cancer; blood liquid biopsy for the early detection of cancer; blood biomarkers tests for early detection of dementia; artificial intelligence technology for the early detection of dementia; and the Apple Watch Series 4 electrocardiogram sensor for detection of atrial fibrillation. We will identify media coverage using Google News and the LexisNexis and ProQuest electronic databases. Sets of two independent reviewers will conduct story screening and coding. We will include English language media stories referring to any of the five tests from January 2016 to May 2019. We will include media stories if they refer to any benefits or harms of the screening test for our conditions of interest. Data will be analysed using categorical data analysis and multinomial logistic regression.

**Ethics and dissemination** No ethical approval is required for this study. Results will be presented at relevant scientific conferences and in peer-reviewed literature.

### Strengths and limitations of this study

- This will be the first study to analyse the media coverage of the benefits and harms of tests that have the potential for overdiagnosis in healthy people.
- Media stories will not be restricted by country.
- The results could inform interventions to improve the quality of medical reporting in the media.
- The study will only consider media coverage of five tests.

## Introduction

Much testing in medicine is aimed at apparently healthy people to identify those at an increased risk of a disease or disorder.<sup>1</sup> These ‘healthy’ people can subsequently be offered more tests, treatment(s), or preventive strategies (e.g. a preventive medicine).<sup>1</sup> The increasing popularity of testing is indicative of recent enthusiasm for early detection,<sup>2</sup> which is part of the promise of ‘precision medicine’. That is, early detection is always better, and treatment is more effective when it is tailored to the individual.<sup>3</sup> Apparently healthy or well people are increasingly encouraged to proactively monitor, and be vigilant about understanding their health, with testing seen as a positive step in consumer health empowerment. However, there is mounting evidence that testing can harm healthy people, and the quest for ever-earlier detection of disease can lead to unnecessary classification of the healthy as sick: overdiagnosis.<sup>3-8</sup>

Although an exact definition of overdiagnosis remains the subject of debate, particularly in the context of non-cancer conditions, overdiagnosis can be considered to occur when persons are labeled with a technically correct diagnosis that does not improve health outcomes.<sup>9-10</sup> Key drivers of overdiagnosis have been identified.<sup>11</sup> One is the use of more sensitive tests which can detect smaller abnormalities, many of which are benign.<sup>11</sup> There is growing evidence demonstrating the presence of overdiagnosis, often arising through testing healthy people, across different areas of medicine. Examples include screening for cancer (e.g. breast, prostate, thyroid), cardiovascular disease, and dementia.<sup>7-8, 12-16</sup> Inappropriate screening in this context is likely to lead to higher healthcare spending and worse outcomes (e.g. psychological effects and unnecessary and harmful treatments).<sup>17-21</sup>

Sustained promotion to the public and patients of the importance of early detection and testing, including via the media, is considered another driver of overdiagnosis.<sup>11</sup> Uncritical coverage of new tests, without consideration of their potential downsides, contributes to the general lack of knowledge about the potential harms of getting tested when healthy. In fact, research has shown that only a small proportion of people are knowledgeable about overdiagnosis. This includes individuals offered tests where the potential for overdiagnosis is high.<sup>22-23</sup> As such, patients (and clinicians) overestimate the benefits of testing, while underestimating the harms.<sup>24-25</sup>

There is also concern about how changing media environments, such as the rising influence of social media, can lead to “junk-food news”.<sup>26</sup> Indeed, previous studies on the media have identified evidence of exaggeration,<sup>27-28</sup> inaccurate media coverage of published scientific papers,<sup>29-30</sup> overstating of benefits of treatments, downplaying of harms,<sup>27-29</sup> and failure to report important conflicts of interest of the experts cited in the story.<sup>27</sup> Concern has also been expressed about the financial closeness between journalists and industry. For example, pharmaceutical industry-funding of journalism practice, awards, and education, have been documented.<sup>31-32</sup> Further, there appears to be a lack of independent medical research commentators in the media. Only one in six media reports of research published in high impact medical journals included comments from people who were independent of the study investigators.<sup>33</sup> Moreover, one in three of the independent commenters had financial conflicts of interest, most of which were not disclosed in the media stories.

Poor media coverage of medicine is a significant issue; it can influence how the public perceives the risk of health services and how patients make treatment decisions.<sup>29-31</sup> For example, media coverage about the celebrity Kylie Minogue's self-referral mammogram bookings led to a 20-

1  
2  
3  
4 fold increase in media coverage about breast cancer and a 40% increase in mammogram bookings  
5 during the 2-week peak after the interview.<sup>34</sup> Six weeks later media coverage was still up by 30%.  
6

7 Media coverage of overtreatment has been examined in one study<sup>35</sup> which examined the  
8 framing of medical overtreatment in US newspapers from January 2007 to December 2010. The study  
9 found that the media focussed on the harms of overtreatment relating to cancer, but the overall media  
10 coverage may have implied that overtreatment was not seen as an issue across other conditions.  
11

12 To date, however, no studies have examined media coverage of new tests with significant  
13 potential for overdiagnosis. Furthermore, there has been little formal, rigorous evaluation of the  
14 media's coverage of testing healthy people. An evaluation may give us an insight into how the media  
15 can contribute to overdiagnosis, and potential strategies to enhance media coverage of testing. In this  
16 study, we aim to examine the media coverage of the benefits and harms of testing the healthy, and  
17 the potential conflicts of interest of those promoting the testing, by examining the coverage of five  
18 tests.  
19  
20  
21  
22  
23

## 24 **Methods and analysis**

### 25 **Overview**

26  
27  
28 We will conduct a large descriptive cross-sectional study of global English-language media  
29 coverage of five tests from January 2016 to May 2019.  
30  
31  
32  
33  
34  
35

### 36 **Tests and conditions of interest**

37  
38 This study will focus on five tests:  
39  
40  
41

- 42 1. 3D mammography for the early detection of breast cancer.
  - 43 2. Blood liquid biopsy tests for the early detection of cancer(s)
  - 44 3. Blood biomarker tests for the early detection of dementia
  - 45 4. Artificial intelligence (AI) technology for the early detection of dementia
  - 46 5. Apple Watch Series 4 electrocardiogram (ECG) sensor for detection of atrial fibrillation (AF)
- 47  
48  
49

50 We identified these tests based on the following criteria:  
51

- 52 1. Evidence based concerns about overdiagnosis.
- 53 2. Evidence of Food and Drug Administration (FDA) approval for certain classes of each test.
- 54 3. Concern that the results of these tests will not lead to improved health outcomes for  
55 individuals; either due to the unavailability of effective treatment options (e.g. dementia) or  
56 treatments that may cause more harm than benefit (e.g. early mammography).  
57  
58  
59  
60

4. Identifiable groups or companies with a financial interest in promoting these tests, or maximising the markets for downstream treatments.
5. Notable media coverage.

One reviewer (MOK) used Google News to track media coverage of tests for the healthy between April 2018 and October 2018. Results were recorded in an excel file. Based on these results, the same reviewer designed a series of Google Alerts (running between April 2018 and December 2018) with specific keywords related to testing. The Google Alert results were screened to identify media coverage on tests for healthy people which met the first four criteria mentioned above. Consideration was given to conducting a descriptive study of a random sample of recent media coverage for all tests. However, we felt that tracking a specific number of tests over time would give us a more comprehensive picture of how the harms and benefits of testing were reported in the media over time. Five tests that were receiving notable media coverage were included. Below we provide details of the five identified tests.

### 1. *3D Mammography for the early detection of breast cancer*

3D mammography or digital breast tomosynthesis (DBT) is an advancement on traditional mammography. Many companies have received FDA approval for 3D mammography,<sup>36-38</sup> partially based on an emerging body of evidence on its detection capability relative to 2D mammography screening.<sup>39</sup> In March 2019, the FDA announced new policies to change current mammography standards in the US. The proposed changes aim to increase the use of 3D mammography screening.

There is a high level of uncertainty surrounding the benefits of 3D mammography. For example, a systematic review and meta-analysis<sup>40</sup> found that 3D mammography improves cancer detection rate and reduces recall for assessment compared to traditional mammography. However, these improvements varied by setting; compared to retrospective studies in the United States where annual screening was encouraged, there were greater improvements observed in prospective studies embedded in the European biennial screening programs.

There is a large amount of research on the benefits and harms of mammography, particularly compared to the other four tests we selected. Overdiagnosis is a significant harm of screening mammography, and notwithstanding uncertainty in the data, there are estimates of its frequency ranging between 10 and 50% of screen-detected cancers.<sup>12 41</sup> Overdiagnosis of breast cancer can lead to unnecessary surgery, radiotherapy and endocrine therapies, as these are standard treatments for women with screen-detected cancers.<sup>12 20 41</sup> These treatments cause harm through physical and psychological effects that can impact on quality of life.<sup>18</sup> Overall, little is known about whether the improved cancer detection rate estimated for 3D mammography screening – compared with 2D mammography screening – will have additional benefit (i.e., whether it will further reduce breast cancer mortality) or whether it will lead to harms (e.g. overdiagnosis), or a combination of both.

## 2. *Liquid biopsy for the early detection of cancer*

A liquid biopsy is a blood test using genomic profiling to detect mutations or cancer cells (circulating tumour DNA cells).<sup>42</sup> The FDA approved the first liquid biopsy in 2016.<sup>43</sup> This class of liquid biopsy was designed for clinicians to monitor cancer status and patient response to treatment. The FDA has since (April 2018) approved another liquid biopsy test by a molecular information company called Foundation Medicine.<sup>44</sup>

While liquid biopsy was initially designed for monitoring patients with cancer, there seems to be increasing interest in its use for the early detection of cancer, and that the test may eventually be used for routinely screening people and detecting cancers before they cause symptoms.<sup>45</sup> In fact, there are ongoing studies assessing whether the test can detect tumors in seemingly cancer-free individuals.<sup>45</sup> There is a lot of uncertainty surrounding the effectiveness of liquid biopsy for both early detection, and improvement of cancer treatment.<sup>46</sup>

There are also concerns that the detection of circulating tumour DNA cells in asymptomatic populations could lead to overdiagnosis.<sup>47</sup> The concerns are linked to findings that circulating tumour DNA cells and cancer-related mutations have been detected in healthy individuals who never go on to develop a cancer.<sup>48 49</sup> It has also been mentioned that the cancer-related proteins used by liquid biopsy can reflect tissue damage common in inflammatory conditions like arthritis, in the absence of cancer.<sup>45</sup>

## 3. *Blood biomarker tests for the early detection of dementia*

There is enormous interest in identifying a cheap and simple test to detect dementia in the early stages, with the hope this will improve the treatment of dementia. In recent years there has been particular interest in blood tests to detect abnormal levels of two proteins: amyloid beta and tau.<sup>50 51</sup> Both are considered biomarkers of dementia.<sup>50</sup> The FDA granted approval to a genetic company called '23andMe' in 2017 to offer direct to consumer tests for the early detection of dementia.<sup>52</sup> The decision has generated controversy with commentators concerned about what they see as a lack of robust evidence to support the testing in the early detection of dementia, concerns about overdiagnosis,<sup>53</sup> and the implications of testing a condition that has not yet been shown to be amenable to intervention.<sup>51 53 54</sup>

In January 2019, the Cochrane Dementia and Cognitive Improvement Group published a commentary expressing their concerns about the increasing use of biomarkers tests in dementia.<sup>53</sup> In their commentary, they referred to research demonstrating that up to 60% of healthy people over 80 years could be labelled as having dementia under new disease definitions, even though these people may never develop clinical symptoms.<sup>55</sup> In the same commentary the authors stated that reducing dementia to positive amyloid biomarkers is "an open invitation to overdiagnosis".<sup>53</sup> Further to this, authors refer to the data documenting the psychological, social and legal harms of over diagnosing or overpredicting dementia.<sup>56</sup> Finally, they expressed concerns about the lack of data validating the proposed biomarkers for dementia.<sup>57</sup>

#### 4. *Artificial intelligence technology for the early detection of dementia*

Similarly to blood tests, there is a keen interest in using artificial intelligence (AI) technology to improve the early detection of dementia. AI refers to the use of machine algorithms (e.g. computer programmes) to model intelligent behaviour with minimal human intervention.<sup>58</sup> The FDA has now approved one type of AI technology to monitor brain structures in different neurological conditions, including dementia.<sup>59</sup> Since February 2018, the FDA have also relaxed regulatory policies on drugs for dementia so they could approve the delivery of disease treatments to people displaying certain biological signals years before the disease shows outward signs. AI technology has been proposed as a key step in detecting these subtle biological signals of dementia (e.g. small changes in brain size, metabolic changes, memory recognition, voice recognition etc.). Researchers have expressed concerns about the lack of robust clinical research in this area, and the potential of AI to lead to false positives, and overdiagnosis.<sup>60</sup>

#### 5. *Apple Watch series 4 ECG sensor for the early detection of atrial fibrillation*

The Apple Watch Series 4 was released in 2018. It features an electrocardiogram (ECG) sensor that has received FDA medical device approval.<sup>61</sup> The primary rationale for this new sensor is to facilitate the early detection of atrial fibrillation (AF). AF is the most common heart arrhythmia (irregular heartbeat), and can be associated with an increased risk of mortality, heart failure, and stroke.<sup>62-64</sup> Because of this, a diagnosis of AF can often lead to drug therapy and in some cases, surgery.<sup>63</sup> The Apple ECG sensor records electrical impulses patterns of a person's heart to predict AF. The sensor will inform the user of the presence of AF and advise on the need for medical consultation. Many concerns about been expressed about testing the healthy for AF, and it has been suggested that overdiagnosis is "only a matter of time" with the Apple Watch.<sup>65-67</sup> There is a concern regarding the poor specificity of testing methods for AF.<sup>66</sup> Furthermore, AF has a low prevalence<sup>68</sup> and screening the healthy could potentially lead to harms in the form of overdiagnosis and overtreatment.<sup>67</sup> In fact, some researchers state that the Apple watch specifically could lead to a misdiagnosis of AF in nearly 1 million people for every 10 million screened. This may lead to harms from overtesting, bleeding from unnecessary anticoagulation, and anxiety due to having a cardiac diagnosis.<sup>67</sup> There also seems to be a lack of knowledge around the natural history of AF. For example, there is uncertainty surrounding the outcome of untreated stroke risks, so the net benefit of treating AF with anti-coagulants is unclear. Finally, while screening for AF leads to increased detection, office visits, and prescriptions for anticoagulants,<sup>69</sup> there is still uncertainty around its effects on patient outcomes.

#### **Search strategy**

We will identify all relevant English-language media stories by searching the LexisNexis and ProQuest electronic databases, using explicit keywords, from January 2016 to May 2019. In line with a previous study on media coverage of medicine,<sup>70</sup> we will supplement this database search with a Google News search, reviewing the first 20 pages of each Google search result. Different keywords



1  
2  
3  
4 will be required for each of the five tests; therefore 5 searches (one specific to each test) will be  
5 performed.. A librarian/information specialist with expertise in systematic review search design will  
6 assist with the search strategy. We will not restrict articles by country. Our searches will cover all of  
7 the following media coverage: newspapers, major world publications, blogs, magazines, broadcast  
8 and podcast transcripts, wire feeds/services, and webnews. These are named categories within the  
9 LexisNexis and Proquest databases.  
10  
11  
12  
13  
14

### 15 **Inclusion and exclusion criteria**

16  
17 We will include media stories referring to any of our five target tests for the corresponding conditions  
18 of interest. Media stories will be included if they refer to any benefits (e.g. early detection of the  
19 condition, early treatment of the condition, prevention of the condition, saves lives) or harms of the  
20 test (e.g. overdiagnosis, inappropriate diagnostic testing, misdiagnosis, false alarms, false positives,  
21 false negatives, unnecessary and/or harmful treatment, psychological distress, healthy anxiety, costs).  
22 We will exclude media stories that only focus on tests for symptomatic people or people who already  
23 have the condition of interest (e.g. mammography for monitoring the progression of breast cancer),  
24 media stories about patent approval or business issues only, press releases, conference proceedings,  
25 trade journal reports, and scholarly journal articles. We will first pilot our screening process.  
26 Depending on the results of the pilot, we may add additional criteria, or provide more detail on the  
27 current inclusion and exclusion criteria.  
28  
29  
30  
31  
32

### 33 **Screening process**

34  
35 Sets of two independent reviewers will be involved in performing the screening of media stories for  
36 each test. We will exclude exact duplicates (same title, same outlet, and same date) before starting  
37 the screening and will keep track of the number of duplicates. Reviewers will independently assess  
38 the eligibility of media reports for potential inclusion according to the predefined selection criteria.  
39 Any disagreements in judgement will be resolved by discussion to reach consensus or by consultation  
40 with another author (RM). Syndicated studies will be included but will only be coded once. For  
41 example, if there are 10 media stories about the Apple Watch where the same or extremely similar  
42 story has been run across multiple media outlets, we will code this story once, but include the number  
43 10 as the number of media reports about the Apple Watch.  
44  
45  
46  
47  
48  
49

### 50 **Data extraction and coding**

51  
52 We will use a structured template (See Table 1) to extract and code the relevant data in Research  
53 Electronic Data Capture (REDCap) hosted at The University of Sydney.<sup>71</sup> The data extraction tool  
54 will be adapted from tools used in similar studies<sup>27 70 72</sup> and an iterative design process will be used  
55 to refine the tool for the purpose of our study. Before formal data extraction and coding, a number of  
56 reviewers will independently apply the data extraction tool to code 20 media stories; four for each  
57  
58  
59  
60

test. Disagreements in data extraction and coding will be resolved by discussion and subsequent revisions to the data extraction tool. We plan to extract information about the media story (e.g. type of media, test mentioned, country of origin), benefits mentioned, harms mentioned, disclosure of conflicts of interest, and the overall tone of the story (positive or negative).

**Table 1: Draft Coding Tool**

| <b>Media story description</b>                               |                                                                                                 |                                                                                                       |
|--------------------------------------------------------------|-------------------------------------------------------------------------------------------------|-------------------------------------------------------------------------------------------------------|
| Name of media source                                         |                                                                                                 | e.g., New York Times                                                                                  |
| Country of media source                                      |                                                                                                 |                                                                                                       |
| Word count                                                   |                                                                                                 |                                                                                                       |
| Release Date                                                 |                                                                                                 |                                                                                                       |
| Author name                                                  |                                                                                                 |                                                                                                       |
| Type of media                                                |                                                                                                 | e.g., 1=newspaper, 2=magazine, 3=radio, 4=TV, 4-blog/opinion piece, 4-wire news, 5=unclear/not stated |
| Test mentioned                                               | In the headline                                                                                 | 1=Yes, 0=No                                                                                           |
|                                                              | In the body                                                                                     | 1=Yes, 0=No                                                                                           |
| Mention of the health condition that the test is used for?   | Yes/No                                                                                          | 1=Yes, (record condition)<br>0=No                                                                     |
| <b>Context about the screening test (benefits and harms)</b> |                                                                                                 |                                                                                                       |
| <b><i>How benefit was described</i></b>                      |                                                                                                 |                                                                                                       |
| Any benefit mentioned or implied?                            | Yes/No                                                                                          | 1=Yes, 0=No                                                                                           |
| Any benefit quantified?                                      | Yes/No                                                                                          | 1=Yes, (record how quantified)<br>0=No                                                                |
| Was anecdote or other real-life example of benefit given?    | Yes/No                                                                                          | 1=Yes, 0=No                                                                                           |
|                                                              | Anecdote                                                                                        | 1=Yes, 0=No                                                                                           |
|                                                              | Celebrity                                                                                       | 1=Yes, 0=No                                                                                           |
|                                                              | Benefits referred to as revolutionary, life-saving, breakthrough, leading to improved treatment |                                                                                                       |
| <b><i>How harm was described</i></b>                         |                                                                                                 |                                                                                                       |
| Any harm mentioned or implied?                               |                                                                                                 | 1=Yes, 0=No                                                                                           |
| Any harm quantified?                                         |                                                                                                 | 1=Yes, (record how quantified)<br>0=No                                                                |

|                                                                             |                                                                                                                                             |                                                                                                                              |
|-----------------------------------------------------------------------------|---------------------------------------------------------------------------------------------------------------------------------------------|------------------------------------------------------------------------------------------------------------------------------|
| Was anecdote or other real-life example of harm given?                      | Yes/No                                                                                                                                      | 1=Yes, 0=No                                                                                                                  |
|                                                                             | Anecdote                                                                                                                                    | 1=Yes, 0=No                                                                                                                  |
|                                                                             | Celebrity                                                                                                                                   | 1=Yes, 0=No                                                                                                                  |
|                                                                             | Any specific harms of screening mentioned? (e.g. overdiagnosis, potential overtreatment)                                                    | 1=Yes, (record specific harm)<br>0=No                                                                                        |
| <b>Evidence of conflicts of interest</b>                                    |                                                                                                                                             |                                                                                                                              |
| Any specific scientific study quoted or mentioned about the screening test? | Yes/No                                                                                                                                      | 1=Yes, 0=No                                                                                                                  |
|                                                                             | Does the scientific study disclose any financial ties of the authors to the manufacturers of the screening test discussed in story?         | 1=Yes, 0=No<br>If yes, state verbatim                                                                                        |
|                                                                             | Did the media story include information about financial ties of the authors to the manufacturer of the screening test? (if relevant)        | 1= Yes, 0=No                                                                                                                 |
|                                                                             | Does the scientific study mention receipt of study funding from the manufacturers of the screening test discussed in story?                 | 1= Yes, 0=No                                                                                                                 |
|                                                                             | Did the media story include information about receipt of study funding from the manufacturers of the relevant screening test? (if relevant) | 1= Yes, 0=No                                                                                                                 |
| Other sources quoted or mentioned about the screening test                  | Yes/No                                                                                                                                      | 1= Yes, 0=No                                                                                                                 |
|                                                                             | Physician/provider?                                                                                                                         | 1= Yes, 0=No                                                                                                                 |
|                                                                             | Patient quoted?                                                                                                                             | 1= Yes, 0=No                                                                                                                 |
|                                                                             | Other source?                                                                                                                               | 1= Yes, 0=No                                                                                                                 |
| <b>Overall impressions/tone</b>                                             |                                                                                                                                             |                                                                                                                              |
| Media story leaves you with sense that the screening test is                |                                                                                                                                             | 1=Beneficial overall<br>2= Harmful overall<br>3= Neutral (balanced information given about benefits and harms)<br>4= Unclear |
| Overall tone about going for the screening test                             |                                                                                                                                             | 1= Overall positive (worth getting)                                                                                          |

|                                                                                                                                                                      |  |                                                                                              |
|----------------------------------------------------------------------------------------------------------------------------------------------------------------------|--|----------------------------------------------------------------------------------------------|
|                                                                                                                                                                      |  | 2= Overall negative (avoid it)<br>3= Neutral (balanced information about benefits and harms) |
| Paste in anything else unusual, interesting or any especially juicy quotes (including source) (e.g. screening tests being lifesaving, a breakthrough, revolutionary) |  | Leave a comment or paste here anything interesting (even quotes)                             |

**Note:** This is a draft coding tool. The tool may be modified once the reviewers pilot test it with a sample of included media stories.

### Data analysis

Descriptive statistics (means, standard deviations (SD), counts and percentages) will be used to summarise the extracted data (e.g. number of stories, number of countries, number reporting benefits and harms, etc.). Analysis will be performed separately for each test. Categorical data analysis will be used to investigate potential associations between overall impression of the media reports and explanatory variables including conflicts of interest, time, and type of media. We plan to use multinomial logistic regression where the dependent variable is overall impression and a neutral impression is the reference category. We will report odds ratios and 95% confidence intervals for negative impressions and positive impressions associated with the independent explanatory variables (as referred to above). Analysis will be conducted separately for each test. We will use chi-square tests to compare the distribution of categories of overall impressions across the 5 tests. We will also outline at least one example of a media story for each test in the results section.

### Ethical considerations

No ethical approval is required for this study.

### Patient or Public Involvement

Patients and members of the public were not involved in the design of this study.

### Dissemination

The results of this study will be published and presented at relevant medical conferences. We anticipate the results of this study will inform the development of an intervention to improve the quality of medical reporting in the media.

## Discussion

This study will examine media coverage reporting the benefits and harms of five medical tests that are controversially being promoted to the healthy. While other drivers, including research and professional prominence given to early detection,<sup>2</sup> are important, sustained media coverage is likely a powerful source of influence of public attitudes towards new tests. The results will provide valuable information about the quality of media reporting on tests targeting the healthy and inform interventions to improve the quality of medical reporting.

For peer review only

**References:**

1. Grimes DA, Schulz KF. Uses and abuses of screening tests. *The Lancet* 2002;359(9309):881-84.
2. Hofmann B, Skolbekken J-A. Surge in publications on early detection. *BMJ* 2017;357:j2102. doi: 10.1136/bmj.j2102
3. Hunt S, Jha S. Can precision medicine reduce overdiagnosis? *Acad Radiol* 2015;22(8):1040-1.
4. Brodersen J, Kramer BS, Macdonald H, et al. Focusing on overdiagnosis as a driver of too much medicine. *BMJ* 2018;362:k3494.
5. Moynihan R, Doust J, Henry D. Preventing Overdiagnosis: how to stop harming the healthy. *BMJ* 2015;344:e3502.
6. Glasziou P, Moynihan R, Richards T, et al. Too much medicine; too little care. *BMJ* 2013;347:f4247.
7. Ahn HS, Kim HJ, Welch HG. Korea's thyroid-cancer "epidemic"—screening and overdiagnosis. *N Engl J Med* 2014;371(19):1765-67.
8. Vaccarella S, Franceschi S, Bray F, et al. Worldwide thyroid-cancer epidemic? The increasing impact of overdiagnosis. *N Engl J Med* 2016;375(7):614-17.
9. Bell KJ, Doust J, Glasziou P, et al. Recognizing the Potential for Overdiagnosis: Are High-Sensitivity Cardiac Troponin Assays an Example? *Ann Intern Med* 2019;170(4):259-61.
10. Carter SM, Degeling C, Doust J, et al. A definition and ethical evaluation of overdiagnosis. *J Med Ethics* 2016;42(11):705-14.
11. Pathirana T, Clark J, Moynihan R. Mapping the drivers of overdiagnosis to potential solutions. *BMJ* 2017;358:j3879.
12. Welch HG, Prorok PC, O'Malley AJ, et al. Breast-cancer tumor size, overdiagnosis, and mammography screening effectiveness. *N Engl J Med* 2016;375(15):1438-47.
13. Etzioni R, Penson DF, Legler JM, et al. Overdiagnosis due to prostate-specific antigen screening: lessons from US prostate cancer incidence trends. *J Natl Cancer Inst* 2002;94(13):981-90.
14. Bell KJ, Del Mar C, Wright G, et al. Prevalence of incidental prostate cancer: A systematic review of autopsy studies. *Int J Cancer* 2015;137(7):1749-57.
15. Niemantsverdriet E, Feyen BF, Le Bastard N, et al. Overdiagnosing vascular dementia using structural brain imaging for dementia work-up. *J Alzheimers Dis* 2015;45(4):1039-43.
16. Schmidt T, Maag R, Foy AJ. Overdiagnosis of coronary artery disease detected by coronary computed tomography angiography: a teachable moment. *JAMA Intern Med* 2016;176(12):1747-48.
17. Cotter AR, Vuong K, Mustelin LL, et al. Do psychological harms result from being labelled with an unexpected diagnosis of abdominal aortic aneurysm or prostate cancer through screening? A systematic review. *BMJ Open* 2017;7(12):e017565.
18. Nelson HD, Pappas M, Cantor A, et al. Harms of breast cancer screening: systematic review to update the 2009 US Preventive Services Task Force Recommendation. *Ann Intern Med* 2016;164(4):256-67.
19. DeFrank JT, Barclay C, Sheridan S, et al. The psychological harms of screening: the evidence we have versus the evidence we need. *J Gen Intern Med* 2015;30(2):242-48.
20. Welch HG, Passow HJ. Quantifying the benefits and harms of screening mammography. *JAMA Intern Med* 2014;174(3):448-54.
21. Prasad V, Lenzer J, Newman DH. Why cancer screening has never been shown to "save lives"—and what we can do about it. *BMJ* 2016;352:h6080.
22. Moynihan R, Nickel B, Hersch J, et al. Public opinions about overdiagnosis: a national community survey. *PLoS One* 2015;10(5):e0125165.

23. Ghanouni A, Meisel SF, Renzi C, et al. Survey of public definitions of the term ‘overdiagnosis’ in the UK. *BMJ Open* 2016;6(4)
24. Hoffmann TC, Del Mar C. Patients’ expectations of the benefits and harms of treatments, screening, and tests: a systematic review. *JAMA Intern Med* 2015;175(2):274-86.
25. Hoffmann TC, Del Mar C. Clinicians’ expectations of the benefits and harms of treatments, screening, and tests: a systematic review. *JAMA Intern Med* 2017;177(3):407-19.
26. Medew J, Moynihan R. Improving coverage of medical research in a changing media environment. *CMAJ* 2017;189(15):E551.
27. Moynihan R, Bero L, Ross-Degnan D, et al. Coverage by the news media of the benefits and risks of medications. *N Engl J Med* 2000;342(22):1645-50.
28. Cassels A, Hughes MA, Cole C, et al. Drugs in the news: an analysis of Canadian newspaper coverage of new prescription drugs. *CMAJ* 2003;168(9):1133-37.
29. Goldacre B. Preventing bad reporting on health research. *BMJ* 2014;349:g7465.
30. Almomani B, Hawwa AF, Goodfellow NA, et al. Pharmacogenetics and the print media: what is the public told? *BMC Med Genet* 2015;16(1):32.
31. Schwartz LM, Woloshin S, Moynihan R. Who's watching the watchdogs? *BMJ* 2008;337(9):a2535.
32. Moynihan R. Making medical journalism healthier. *The Lancet* 2003;361(9375):2097-98.
33. Wang MT, Grey A, Bolland MJ. Conflicts of interest and expertise of independent commenters in news stories about medical research. *CMAJ* 2017;189(15):E553-E59.
34. Chapman S, McLeod K, Wakefield M, et al. Impact of news of celebrity illness on breast cancer screening: Kylie Minogue's breast cancer diagnosis. *Med J Aust* 2005;183(5):247-50.
35. Walsh-Childers K, Braddock J. Competing with the conventional wisdom: newspaper framing of medical overtreatment. *Health Commun* 2014;29(2):157-72.
36. Hologic I. FDA Approves Hologic's Genius™ 3D Mammography™ Exam as the Only Mammogram Superior for Women with Dense Breasts\* 2017 [Available from: <https://www.prnewswire.com/news-releases/fda-approves-hologics-genius-3d-mammography-exam-as-the-only-mammogram-superior-for-women-with-dense-breasts-300469885.html>].
37. Healio. FDA approves 3-D mammography system 2011 [Available from: <https://www.healio.com/hematology-oncology/breast-cancer/news/print/hemonc-today/%7Ba61b1afa-4238-4b58-8f6a-f9298833f19b%7D/fda-approves-3-d-mammography-system>].
38. News IT. FDA Approves New Imaging Features on Hologic 3Dimensions Mammography System. 2018
39. Zackrisson S, Lång K, Rosso A, et al. One-view breast tomosynthesis versus two-view mammography in the Malmö Breast Tomosynthesis Screening Trial (MBTST): a prospective, population-based, diagnostic accuracy study. *Lancet Oncol* 2018;19(11):1493-503.
40. Marinovich ML, Hunter KE, Macaskill P, et al. Breast Cancer Screening Using Tomosynthesis or Mammography: A Meta-analysis of Cancer Detection and Recall. *J Natl Cancer Inst* 2018;110(9):942-49.
41. Barratt AL, Glasziou PP. Do the benefits of screening mammography outweigh the harms of overdiagnosis and unnecessary treatment? *Med J Aust* 2012;196(11):681.
42. Crowley E, Di Nicolantonio F, Loupakis F, et al. Liquid biopsy: monitoring cancer-genetics in the blood. *Nat Rev Clin Oncol* 2013;10(8):472.
43. US Food and Drug Administration (FDA). FDA approves first blood test to detect gene mutation associated with non-small cell lung cancer 2016 [Available from: <https://www.fda.gov/newsevents/newsroom/pressannouncements/ucm504488.htm>].

1  
2  
3  
4  
5  
6  
7  
8  
9  
10  
11  
12  
13  
14  
15  
16  
17  
18  
19  
20  
21  
22  
23  
24  
25  
26  
27  
28  
29  
30  
31  
32  
33  
34  
35  
36  
37  
38  
39  
40  
41  
42  
43  
44  
45  
46  
47  
48  
49  
50  
51  
52  
53  
54  
55  
56  
57  
58  
59  
60

44. Medicine F. Foundation Medicine's New Liquid Biopsy Assay Granted Breakthrough Device Designation by U.S. Food and Drug Administration 2018 [Available from: <http://investors.foundationmedicine.com/news-releases/news-release-details/foundation-medicines-new-liquid-biopsy-assay-granted>].
45. Kaiser J. 'Liquid biopsy' for cancer promises early detection. *Science* 2018;359(6373):259-59. doi: 10.1126/science.359.6373.259
46. Merker JD, Oxnard GR, Compton C, et al. Circulating Tumor DNA Analysis in Patients With Cancer: American Society of Clinical Oncology and College of American Pathologists Joint Review. *J Clin Oncol* 2018;36(16):1631-41.
47. Palmirotta R, Lovero D, Cafforio P, et al. Liquid biopsy of cancer: a multimodal diagnostic tool in clinical oncology. *Ther Adv Med Oncol* 2018;10:1758835918794630-30.
48. Kato S, Lippman SM, Flaherty KT, et al. The conundrum of genetic "drivers" in benign conditions. *J Natl Cancer Inst* 2016;108(8):djw036.
49. Gormally E, Vineis P, Matullo G, et al. TP53 and KRAS2 mutations in plasma DNA of healthy subjects and subsequent cancer occurrence: a prospective study. *Cancer Res* 2006;66(13):6871-76.
50. Ritchie C, Smailagic N, Noel-Storr AH, et al. CSF tau and the CSF tau/ABeta ratio for the diagnosis of Alzheimer's disease dementia and other dementias in people with mild cognitive impairment (MCI). *Cochrane Database Syst Rev* 2017;3:CD010803.
51. Chambers LW, Sivananthan S, Brayne C. Is Dementia Screening of Apparently Healthy Individuals Justified? *Adv Prev Med* 2017
52. 23andMe I. 23andMe, Inc. Granted First FDA Authorization to Market Direct-to-Consumer Genetic Health Risk Reports 2017 [Available from: <https://mediacenter.23andme.com/press-releases/23andme-inc-granted-first-fda-authorization-market-direct-consumer-genetic-health-risk-reports/>].
53. McCleery J, Flicker L, Richard E, et al. The National Institute on Aging and Alzheimer's Association research framework: A commentary from the Cochrane Dementia and Cognitive Improvement Group. *Alzheimers Dement* 2019;15(1):179-81.
54. Brunet M. Targets for dementia diagnoses will lead to overdiagnosis. *BMJ* 2014;348:g2224.
55. Schneider JA, Arvanitakis Z, Bang W, et al. Mixed brain pathologies account for most dementia cases in community-dwelling older persons. *Neurology* 2007;69(24):2197-204.
56. Bemelmans S, Tromp K, Bunnik E, et al. Psychological, behavioral and social effects of disclosing Alzheimer's disease biomarkers to research participants: a systematic review. *Alzheimer's Research & Therapy* 2016;8(1):46.
57. Noel-Storr AH, Flicker L, Ritchie CW, et al. Systematic review of the body of evidence for the use of biomarkers in the diagnosis of dementia. *Alzheimer's & Dementia* 2013;9(3):e96-e105.
58. Verghese A, Shah NH, Harrington RA. What this computer needs is a physician: humanism and artificial intelligence. *JAMA* 2018;319(1):19-20.
59. Icometrix. FDA clears icometrix' image quantification software to monitor neurological disorders 2016 [Available from: <https://www.prnewswire.com/news-releases/fda-clears-icomatrix-image-quantification-software-to-monitor-neurological-disorders-300322995.html>].
60. Komorowski M, Celi LA. Will Artificial Intelligence Contribute to Overuse in Healthcare? *Crit Care Med* 2017;45(5):912-13.
61. Owen M. Apple Watch Series 4 is first consumer device to receive FDA clearance for ECG monitoring 2018 [Available from: <https://appleinsider.com/articles/18/09/12/apple-watch-series-4-is-first-consumer-device-to-receive-fda-clearance-for-ecg-monitoring>].



- 1
- 2
- 3
- 4
- 5 62. Go AS, Reynolds K, Yang J, et al. Association of burden of atrial fibrillation with risk of ischemic
- 6 stroke in adults with paroxysmal atrial fibrillation: The kp-rhythm study. *JAMA Cardiol*
- 7 2018;3(7):601-08.
- 8 63. Brieger D, Amerena J, Attia J, et al. National Heart Foundation of Australia and the Cardiac
- 9 Society of Australia and New Zealand: Australian Clinical Guidelines for the Diagnosis and
- 10 Management of Atrial Fibrillation 2018. *Heart Lung Circ* 2018;27(10):1209-66.
- 11 64. Chen LY, Chung MK, Allen LA, et al. Atrial fibrillation burden: moving beyond atrial fibrillation
- 12 as a binary entity: a scientific statement from the American Heart Association. *Circulation*
- 13 2018;137(20):e623-e44.
- 14 65. Mandrola J. Overdiagnosis Only a Matter of Time With ECG Watches 2017 [Available from:
- 15 <https://www.medscape.com/viewarticle/889753>.
- 16 66. Mandrola J, Foy A, Naccarelli G. Screening for atrial fibrillation comes with many snags. *JAMA*
- 17 *Intern Med* 2018;178(10):1296-98.
- 18 67. Mandrola J, Foy A. Downsides of Detecting Atrial Fibrillation in Asymptomatic Patients. *Am*
- 19 *Fam Physician* 2019;99(6):354-55.
- 20 68. Svennberg E, Engdahl J, Al-Khalili F, et al. Mass screening for untreated atrial fibrillation: the
- 21 STROKESTOP study. *Circulation* 2015;131(25):2176-84.
- 22 69. Steinhubl SR, Waalen J, Edwards AM, et al. Effect of a home-based wearable continuous ECG
- 23 monitoring patch on detection of undiagnosed atrial fibrillation: the mSToPS randomized
- 24 clinical trial. *JAMA* 2018;320(2):146-55.
- 25 70. Woloshin S, Schwartz LM, Dejene S, et al. Media Coverage of FDA Drug Safety
- 26 Communications about Zolpidem: A Quantitative and Qualitative Analysis. *J Health*
- 27 *Commun* 2017;22(5):365-72.
- 28 71. Harris PA, Taylor R, Thielke R, et al. Research electronic data capture (REDCap)—a metadata-
- 29 driven methodology and workflow process for providing translational research informatics
- 30 support. *J Biomed Inform* 2009;42(2):377-81.
- 31 72. Moynihan R, Clark J, L A. Media coverage of the benefits and harms of the 2017 expanded
- 32 definition of hypertension. *JAMA Intern Med* 2018
- 33
- 34
- 35
- 36
- 37
- 38
- 39
- 40
- 41
- 42
- 43
- 44
- 45
- 46
- 47
- 48
- 49
- 50
- 51
- 52
- 53
- 54
- 55
- 56
- 57
- 58
- 59
- 60

1  
2  
3  
4  
5  
6  
7  
8  
9  
10  
11  
12  
13  
14  
15  
16  
17  
18  
19  
20  
21  
22  
23  
24  
25  
26  
27  
28  
29  
30  
31  
32  
33  
34  
35  
36  
37  
38  
39  
40  
41  
42  
43  
44  
45  
46  
47  
48  
49  
50  
51  
52  
53  
54  
55  
56  
57  
58  
59  
60

**Acknowledgement:** We would like to thank Professor Andrew D. Oxman (Centre for Informed Health Choices, Norwegian Institute of Public Health, Oslo, Norway and University of Oslo, Oslo, Norway) for providing feedback on an earlier draft of this protocol.

**Authors' contributions:** MOK, RM, AB, and CM have been primarily responsible for study conception, design, and designing the data coding approach. MJ advised on statistical analysis. JZ and AF helped pilot the search strategy and coding tool. MOK drafted the first version of this manuscript. All authors provided critical evaluation and revision of the manuscript and had given final approval of the manuscript accepting responsibility for all aspects.

**Funding statement:** This study will not receive any specific funding. MOK is supported by a European Union Marie Skłodowska-Curie postdoctoral fellowship. AB and RM are investigators on a National Health and Medical Research Council of Australia (NHMRC) funded CRE grant No.1104136. RM is supported by an NHMRC grant, #1124207. AF is a post-doctoral fellow on an Australian NHMRC project grant no.1122332. CGM is supported by an Australian NMHRC Research Fellowship. This specific study received no specific grant from any funding agency in public, commercial or not-for-profit sectors.

**Competing interests statement:** None to declare

# BMJ Open

## Media coverage of the benefits and harms of testing the healthy: a protocol for a descriptive study

|                                 |                                                                                                                                                                                                                                                                                                                                                                                                                                                                                                                                         |
|---------------------------------|-----------------------------------------------------------------------------------------------------------------------------------------------------------------------------------------------------------------------------------------------------------------------------------------------------------------------------------------------------------------------------------------------------------------------------------------------------------------------------------------------------------------------------------------|
| Journal:                        | <i>BMJ Open</i>                                                                                                                                                                                                                                                                                                                                                                                                                                                                                                                         |
| Manuscript ID                   | bmjopen-2019-029532.R2                                                                                                                                                                                                                                                                                                                                                                                                                                                                                                                  |
| Article Type:                   | Protocol                                                                                                                                                                                                                                                                                                                                                                                                                                                                                                                                |
| Date Submitted by the Author:   | 11-Jul-2019                                                                                                                                                                                                                                                                                                                                                                                                                                                                                                                             |
| Complete List of Authors:       | O'Keeffe, Mary; The University of Sydney School of Public Health; Institute for Musculoskeletal Health ,<br>Barratt, Alexandra; The University of Sydney School of Public Health<br>Maher, Christopher; The University of Sydney School of Public Health; Institute for Musculoskeletal Health<br>Zadro, Joshua; The University of Sydney School of Public Health; Institute for Musculoskeletal Health<br>Fabbri, Alice; The University of Sydney School of Pharmacy<br>Jones, Mark; Bond University<br>Moynihan, Ray; Bond University |
| <b>Primary Subject Heading</b>: | Public health                                                                                                                                                                                                                                                                                                                                                                                                                                                                                                                           |
| Secondary Subject Heading:      | Communication                                                                                                                                                                                                                                                                                                                                                                                                                                                                                                                           |
| Keywords:                       | testing the healthy, media coverage, benefits, harms, overdiagnosis                                                                                                                                                                                                                                                                                                                                                                                                                                                                     |
|                                 |                                                                                                                                                                                                                                                                                                                                                                                                                                                                                                                                         |

SCHOLARONE™  
Manuscripts

1  
2  
3  
4 **Media coverage of the benefits and harms of testing the healthy: a protocol for a descriptive**  
5 **study**  
6  
7

8 Mary O’Keeffe<sup>1,2</sup> Email: [Mary.OKeeffe@sydney.edu.au](mailto:Mary.OKeeffe@sydney.edu.au)

9 Alexandra Barratt<sup>1</sup> Email: [Alexandra.Barratt@sydney.edu.au](mailto:Alexandra.Barratt@sydney.edu.au)

10 Christopher Maher<sup>1,2</sup> Email: [Christopher.Maher@sydney.edu.au](mailto:Christopher.Maher@sydney.edu.au)

11 Joshua R. Zadro<sup>1,2</sup> Email: [Joshua.Zadro@sydney.edu.au](mailto:Joshua.Zadro@sydney.edu.au)

12 Alice Fabbri<sup>3</sup> Email: [Alice.Fabbri@sydney.edu.au](mailto:Alice.Fabbri@sydney.edu.au)

13 Mark Jones<sup>4</sup> Email: [Majones@bond.edu.au](mailto:Majones@bond.edu.au)

14 Ray Moynihan<sup>4</sup> Email: [Rmoyniha@bond.edu.au](mailto:Rmoyniha@bond.edu.au)  
15  
16  
17  
18

19 <sup>1</sup>Sydney School of Public Health, Faculty of Medicine and Health, University of Sydney, Sydney,  
20 New South Wales, Australia.

21 <sup>2</sup> Institute for Musculoskeletal Health, Sydney, New South Wales, Australia.

22 <sup>3</sup> Charles Perkins Centre and School of Pharmacy, Faculty of Medicine and Health, University of  
23 Sydney, Sydney, New South Wales, Australia.

24 <sup>4</sup> Centre for Research in Evidence-Based Practice, Bond University, Gold Coast, Queensland,  
25 Australia.  
26  
27  
28  
29  
30

31 **Corresponding author:**  
32

33 Mary O’Keeffe, PhD

34 Sydney School of Public Health, Faculty of Medicine and Health, University of Sydney, Sydney,  
35 Australia

36 E: [Mary.OKeeffe@sydney.edu.au](mailto:Mary.OKeeffe@sydney.edu.au)

37 T: +612 8627 6856  
38  
39  
40  
41  
42  
43

44 **Word count:** 3715  
45  
46  
47  
48  
49  
50  
51  
52  
53  
54  
55  
56  
57  
58  
59  
60

## Abstract

**Introduction** Much testing in medicine is aimed at healthy people to facilitate the early detection of health conditions. However, there is growing evidence that early detection is a double-edged sword that may cause harm in the form of overdiagnosis. The media can be seen as a major generator of consumer demand for health services. Previous research shows that media coverage tends to overstate the benefits and downplay the harms of medical interventions for the sick, and often fails to cover relevant conflicts of interest of those promoting those interventions. However, little is known about how the benefits and harms of testing the healthy are covered by media. This study will examine the media coverage of the benefits and harms of testing the healthy, and coverage of potential conflicts of interest of those promoting the testing.

**Methods and analysis** We will examine five tests: 3D mammography for the early detection of breast cancer; blood liquid biopsy for the early detection of cancer; blood biomarkers tests for early detection of dementia; artificial intelligence technology for the early detection of dementia; and the Apple Watch Series 4 electrocardiogram sensor for detection of atrial fibrillation. We will identify media coverage using Google News and the LexisNexis and ProQuest electronic databases. Sets of two independent reviewers will conduct story screening and coding. We will include English language media stories referring to any of the five tests from January 2016 to May 2019. We will include media stories if they refer to any benefits or harms of the screening test for our conditions of interest. Data will be analysed using categorical data analysis and multinomial logistic regression.

**Ethics and dissemination** No ethical approval is required for this study. Results will be presented at relevant scientific conferences and in peer-reviewed literature.

### Strengths and limitations of this study

- This will be the first study to analyse the media coverage of the benefits and harms of tests that have the potential for overdiagnosis in healthy people.
- Media stories will not be restricted by country.
- The results could inform interventions to improve the quality of medical reporting in the media.
- The study will only consider media coverage of five tests.

## Introduction

Much testing in medicine is aimed at apparently healthy people to identify those at an increased risk of a disease or disorder.<sup>1</sup> These ‘healthy’ people can subsequently be offered more tests, treatment(s), or preventive strategies (e.g. a preventive medicine).<sup>1</sup> The increasing popularity of testing is indicative of recent enthusiasm for early detection,<sup>2</sup> which is part of the promise of ‘precision medicine’. That is, early detection is always better, and treatment is more effective when it is tailored to the individual.<sup>3</sup> Apparently healthy or well people are increasingly encouraged to proactively monitor, and be vigilant about understanding their health, with testing seen as a positive step in consumer health empowerment. However, there is mounting evidence that testing can harm healthy people, and the quest for ever-earlier detection of disease can lead to unnecessary classification of the healthy as sick: overdiagnosis.<sup>3-8</sup>

Although an exact definition of overdiagnosis remains the subject of debate, particularly in the context of non-cancer conditions, overdiagnosis can be considered to occur when persons are labeled with a technically correct diagnosis that does not improve health outcomes.<sup>9-10</sup> Key drivers of overdiagnosis have been identified.<sup>11</sup> One is the use of more sensitive tests which can detect smaller abnormalities, many of which are benign.<sup>11</sup> There is growing evidence demonstrating the presence of overdiagnosis, often arising through testing healthy people, across different areas of medicine. Examples include screening for cancer (e.g. breast, prostate, thyroid), cardiovascular disease, and dementia.<sup>7-8, 12-16</sup> Inappropriate screening in this context is likely to lead to higher healthcare spending and worse outcomes (e.g. psychological effects and unnecessary and harmful treatments).<sup>17-21</sup>

Sustained promotion to the public and patients of the importance of early detection and testing, including via the media, is considered another driver of overdiagnosis.<sup>11</sup> Uncritical coverage of new tests, without consideration of their potential downsides, contributes to the general lack of knowledge about the potential harms of getting tested when healthy. In fact, research has shown that only a small proportion of people are knowledgeable about overdiagnosis. This includes individuals offered tests where the potential for overdiagnosis is high.<sup>22-23</sup> As such, patients (and clinicians) overestimate the benefits of testing, while underestimating the harms.<sup>24-25</sup>

There is also concern about how changing media environments, such as the rising influence of social media, can lead to “junk-food news”.<sup>26</sup> Indeed, previous studies on the media have identified evidence of exaggeration,<sup>27-28</sup> inaccurate media coverage of published scientific papers,<sup>29-30</sup> overstating of benefits of treatments, downplaying of harms,<sup>27-29</sup> and failure to report important conflicts of interest of the experts cited in the story.<sup>27</sup> Concern has also been expressed about the financial closeness between journalists and industry. For example, pharmaceutical industry-funding of journalism practice, awards, and education, have been documented.<sup>31-32</sup> Further, there appears to be a lack of independent medical research commentators in the media. Only one in six media reports of research published in high impact medical journals included comments from people who were independent of the study investigators.<sup>33</sup> Moreover, one in three of the independent commenters had financial conflicts of interest, most of which were not disclosed in the media stories.

Poor media coverage of medicine is a significant issue; it can influence how the public perceives the risk of health services and how patients make treatment decisions.<sup>29-31</sup> For example, media coverage about the celebrity Kylie Minogue's self-referral mammogram bookings led to a 20-

1  
2  
3  
4 fold increase in media coverage about breast cancer and a 40% increase in mammogram bookings  
5 during the 2-week peak after the interview.<sup>34</sup> Six weeks later media coverage was still up by 30%.

7 Media coverage of overtreatment has been examined in one study<sup>35</sup> which examined the  
8 framing of medical overtreatment in US newspapers from January 2007 to December 2010. The study  
9 found that the media focussed on the harms of overtreatment relating to cancer, but the overall media  
10 coverage may have implied that overtreatment was not seen as an issue across other conditions.

12 To date, however, no studies have examined media coverage of new tests with significant  
13 potential for overdiagnosis. Furthermore, there has been little formal, rigorous evaluation of the  
14 media's coverage of testing healthy people. An evaluation may give us an insight into how the media  
15 can contribute to overdiagnosis, and potential strategies to enhance media coverage of testing. In this  
16 study, we aim to examine the media coverage of the benefits and harms of testing the healthy, and  
17 the potential conflicts of interest of those promoting the testing, by examining the coverage of five  
18 tests.  
19  
20  
21  
22  
23

## 24 **Methods and analysis**

### 25 **Overview**

26  
27  
28 We will conduct a large descriptive cross-sectional study of global English-language media  
29 coverage of five tests from January 2016 to May 2019.  
30  
31  
32  
33  
34  
35

### 36 **Tests and conditions of interest**

37  
38 This study will focus on five tests:  
39  
40  
41

- 42 1. 3D mammography for the early detection of breast cancer.
  - 43 2. Blood liquid biopsy tests for the early detection of cancer(s)
  - 44 3. Blood biomarker tests for the early detection of dementia
  - 45 4. Artificial intelligence (AI) technology for the early detection of dementia
  - 46 5. Apple Watch Series 4 electrocardiogram (ECG) sensor for detection of atrial fibrillation (AF)
- 47  
48  
49

50 We identified these tests based on the following criteria:

- 51 1. Evidence based concerns about overdiagnosis.
- 52 2. Evidence of Food and Drug Administration (FDA) approval for certain classes of each test.
- 53 3. Concern that the results of these tests will not lead to improved health outcomes for  
54 individuals; either due to the unavailability of effective treatment options (e.g. dementia) or  
55 treatments that may cause more harm than benefit (e.g. early mammography).  
56  
57  
58  
59  
60

4. Identifiable groups or companies with a financial interest in promoting these tests, or maximising the markets for downstream treatments.
5. Notable media coverage.

One reviewer (MOK) used Google News to track media coverage of tests for the healthy between April 2018 and October 2018. Results were recorded in an excel file. Based on these results, the same reviewer designed a series of Google Alerts (running between April 2018 and December 2018) with specific keywords related to testing. The Google Alert results were screened to identify media coverage on tests for healthy people which met the first four criteria mentioned above. Consideration was given to conducting a descriptive study of a random sample of recent media coverage for all tests. However, we felt that tracking a specific number of tests over time would give us a more comprehensive picture of how the harms and benefits of testing were reported in the media over time. Five tests that were receiving notable media coverage were included. Below we provide details of the five identified tests.

### 1. *3D Mammography for the early detection of breast cancer*

3D mammography or digital breast tomosynthesis (DBT) is an advancement on traditional mammography. Many companies have received FDA approval for 3D mammography,<sup>36-38</sup> partially based on an emerging body of evidence on its detection capability relative to 2D mammography screening.<sup>39</sup> In March 2019, the FDA announced new policies to change current mammography standards in the US. The proposed changes aim to increase the use of 3D mammography screening.

There is a high level of uncertainty surrounding the benefits of 3D mammography. For example, a systematic review and meta-analysis<sup>40</sup> found that 3D mammography improves cancer detection rate and reduces recall for assessment compared to traditional mammography. However, these improvements varied by setting; compared to retrospective studies in the United States where annual screening was encouraged, there were greater improvements observed in prospective studies embedded in the European biennial screening programs.

There is a large amount of research on the benefits and harms of mammography, particularly compared to the other four tests we selected. Overdiagnosis is a significant harm of screening mammography, and notwithstanding uncertainty in the data, there are estimates of its frequency ranging between 10 and 50% of screen-detected cancers.<sup>12 41</sup> Overdiagnosis of breast cancer can lead to unnecessary surgery, radiotherapy and endocrine therapies, as these are standard treatments for women with screen-detected cancers.<sup>12 20 41</sup> These treatments cause harm through physical and psychological effects that can impact on quality of life.<sup>18</sup> Overall, little is known about whether the improved cancer detection rate estimated for 3D mammography screening – compared with 2D mammography screening – will have additional benefit (i.e., whether it will further reduce breast cancer mortality) or whether it will lead to harms (e.g. overdiagnosis), or a combination of both.



## 2. *Liquid biopsy for the early detection of cancer*

A liquid biopsy is a blood test using genomic profiling to detect mutations or cancer cells (circulating tumour DNA cells).<sup>42</sup> The FDA approved the first liquid biopsy in 2016.<sup>43</sup> This class of liquid biopsy was designed for clinicians to monitor cancer status and patient response to treatment. The FDA has since (April 2018) approved another liquid biopsy test by a molecular information company called Foundation Medicine.<sup>44</sup>

While liquid biopsy was initially designed for monitoring patients with cancer, there seems to be increasing interest in its use for the early detection of cancer, and that the test may eventually be used for routinely screening people and detecting cancers before they cause symptoms.<sup>45</sup> In fact, there are ongoing studies assessing whether the test can detect tumors in seemingly cancer-free individuals.<sup>45</sup> There is a lot of uncertainty surrounding the effectiveness of liquid biopsy for both early detection, and improvement of cancer treatment.<sup>46</sup>

There are also concerns that the detection of circulating tumour DNA cells in asymptomatic populations could lead to overdiagnosis.<sup>47</sup> The concerns are linked to findings that circulating tumour DNA cells and cancer-related mutations have been detected in healthy individuals who never go on to develop a cancer.<sup>48 49</sup> It has also been mentioned that the cancer-related proteins used by liquid biopsy can reflect tissue damage common in inflammatory conditions like arthritis, in the absence of cancer.<sup>45</sup>

## 3. *Blood biomarker tests for the early detection of dementia*

There is enormous interest in identifying a cheap and simple test to detect dementia in the early stages, with the hope this will improve the treatment of dementia. In recent years there has been particular interest in blood tests to detect abnormal levels of two proteins: amyloid beta and tau.<sup>50 51</sup> Both are considered biomarkers of dementia.<sup>50</sup> The FDA granted approval to a genetic company called '23andMe' in 2017 to offer direct to consumer tests for the early detection of dementia.<sup>52</sup> The decision has generated controversy with commentators concerned about what they see as a lack of robust evidence to support the testing in the early detection of dementia, concerns about overdiagnosis,<sup>53</sup> and the implications of testing a condition that has not yet been shown to be amenable to intervention.<sup>51 53 54</sup>

In January 2019, the Cochrane Dementia and Cognitive Improvement Group published a commentary expressing their concerns about the increasing use of biomarkers tests in dementia.<sup>53</sup> In their commentary, they referred to research demonstrating that up to 60% of healthy people over 80 years could be labelled as having dementia under new disease definitions, even though these people may never develop clinical symptoms.<sup>55</sup> In the same commentary the authors stated that reducing dementia to positive amyloid biomarkers is "an open invitation to overdiagnosis".<sup>53</sup> Further to this, authors refer to the data documenting the psychological, social and legal harms of over diagnosing or overpredicting dementia.<sup>56</sup> Finally, they expressed concerns about the lack of data validating the proposed biomarkers for dementia.<sup>57</sup>

#### 4. *Artificial intelligence technology for the early detection of dementia*

Similarly to blood tests, there is a keen interest in using artificial intelligence (AI) technology to improve the early detection of dementia. AI refers to the use of machine algorithms (e.g. computer programmes) to model intelligent behaviour with minimal human intervention.<sup>58</sup> The FDA has now approved one type of AI technology to monitor brain structures in different neurological conditions, including dementia.<sup>59</sup> Since February 2018, the FDA have also relaxed regulatory policies on drugs for dementia so they could approve the delivery of disease treatments to people displaying certain biological signals years before the disease shows outward signs. AI technology has been proposed as a key step in detecting these subtle biological signals of dementia (e.g. small changes in brain size, metabolic changes, memory recognition, voice recognition etc.). Researchers have expressed concerns about the lack of robust clinical research in this area, and the potential of AI to lead to false positives, and overdiagnosis.<sup>60</sup>

#### 5. *Apple Watch series 4 ECG sensor for the early detection of atrial fibrillation*

The Apple Watch Series 4 was released in 2018. It features an electrocardiogram (ECG) sensor that has received FDA medical device approval.<sup>61</sup> The primary rationale for this new sensor is to facilitate the early detection of atrial fibrillation (AF). AF is the most common heart arrhythmia (irregular heartbeat), and can be associated with an increased risk of mortality, heart failure, and stroke.<sup>62-64</sup> Because of this, a diagnosis of AF can often lead to drug therapy and in some cases, surgery.<sup>63</sup> The Apple ECG sensor records electrical impulses patterns of a person's heart to predict AF. The sensor will inform the user of the presence of AF and advise on the need for medical consultation. Many concerns about been expressed about testing the healthy for AF, and it has been suggested that overdiagnosis is "only a matter of time" with the Apple Watch.<sup>65-67</sup> There is a concern regarding the poor specificity of testing methods for AF.<sup>66</sup> Furthermore, AF has a low prevalence<sup>68</sup> and screening the healthy could potentially lead to harms in the form of overdiagnosis and overtreatment.<sup>67</sup> In fact, some researchers state that the Apple watch specifically could lead to a misdiagnosis of AF in nearly 1 million people for every 10 million screened. This may lead to harms from overtesting, bleeding from unnecessary anticoagulation, and anxiety due to having a cardiac diagnosis.<sup>67</sup> There also seems to be a lack of knowledge around the natural history of AF. For example, there is uncertainty surrounding the outcome of untreated stroke risks, so the net benefit of treating AF with anti-coagulants is unclear. Finally, while screening for AF leads to increased detection, office visits, and prescriptions for anticoagulants,<sup>69</sup> there is still uncertainty around its effects on patient outcomes.

#### **Search strategy**

We will identify all relevant English-language media stories by searching the LexisNexis and ProQuest electronic databases, using explicit keywords, from January 2016 to May 2019. In line with a previous study on media coverage of medicine,<sup>70</sup> we will supplement this database search with a

1  
2  
3  
4 Google News search, reviewing the first 20 pages of each Google search result. Different keywords  
5 will be required for each of the five tests; therefore 5 searches (one specific to each test) will be  
6 performed. A librarian/information specialist with expertise in systematic review search design will  
7 assist with the search strategy. We will not restrict articles by country. Our searches will cover all of  
8 the following media coverage: newspapers, major world publications, blogs, magazines, broadcast  
9 and podcast transcripts, wire feeds/services, and webnews. These are named categories within the  
10 LexisNexis and Proquest databases.  
11  
12  
13  
14  
15

### 16 **Inclusion and exclusion criteria**

17  
18  
19 We will include media stories referring to any of our five target tests for the corresponding conditions  
20 of interest. Media stories will be included if they refer to any benefits (e.g. early detection of the  
21 condition, early treatment of the condition, prevention of the condition, saves lives) or harms of the  
22 test (e.g. overdiagnosis, inappropriate diagnostic testing, misdiagnosis, false alarms, false positives,  
23 false negatives, unnecessary and/or harmful treatment, psychological distress, healthy anxiety, costs).  
24 We will exclude media stories that only focus on tests for symptomatic people or people who already  
25 have the condition of interest (e.g. mammography for monitoring the progression of breast cancer),  
26 media stories about patent approval or business issues only, press releases, conference proceedings,  
27 trade journal reports, and scholarly journal articles. We will first pilot our screening process.  
28 Depending on the results of the pilot, we may add additional criteria, or provide more detail on the  
29 current inclusion and exclusion criteria.  
30  
31  
32  
33  
34  
35

### 36 **Screening process**

37  
38  
39 Sets of two independent reviewers will be involved in performing the screening of media stories for  
40 each test. We will exclude exact duplicates (same title, same outlet, and same date) before starting  
41 the screening and will keep track of the number of duplicates. Reviewers will independently assess  
42 the eligibility of media reports for potential inclusion according to the predefined selection criteria.  
43 Any disagreements in judgement will be resolved by discussion to reach consensus or by consultation  
44 with a third reviewer (RM). Syndicated studies will be included but will only be coded once. For  
45 example, if there are 10 media stories about the Apple Watch where the same or extremely similar  
46 story has been run across multiple media outlets, we will code this story once, but include the number  
47 10 as the number of media reports about the Apple Watch.  
48  
49  
50  
51  
52

### 53 **Data extraction and coding**

54  
55  
56 We will use a structured template (See Table 1) to extract and code the relevant data in Research  
57 Electronic Data Capture (REDCap) hosted at The University of Sydney.<sup>71</sup> The data extraction tool  
58 will be adapted from tools used in similar studies<sup>27 70 72</sup> and an iterative design process will be used  
59  
60

to refine the tool for the purpose of our study. Sets of two independent reviewers will extract data and code the media stories; two independent reviewers for each test. Any disagreements in extraction or coding will be resolved by discussion to reach consensus or by consultation with a third reviewer (RM). The percentage of disagreements on each coding variable requiring resolution through use of a third reviewer will be recorded. Before formal data extraction and coding, the sets of independent reviewers will apply the data extraction tool to code 20 media stories; four for each test. Disagreements in data extraction and coding will be resolved by discussion and subsequent revisions to the data extraction tool. We plan to extract information about the media story (e.g. type of media, test mentioned, country of origin), benefits mentioned, harms mentioned, disclosure of conflicts of interest, and the overall tone of the story (positive or negative).

**Table 1: Draft Coding Tool**

| <b>Media story description</b>                               |                                                     |                                                                                                       |
|--------------------------------------------------------------|-----------------------------------------------------|-------------------------------------------------------------------------------------------------------|
| Name of media source                                         |                                                     | e.g., New York Times                                                                                  |
| Country of media source                                      |                                                     |                                                                                                       |
| Word count                                                   |                                                     |                                                                                                       |
| Release Date                                                 |                                                     |                                                                                                       |
| Author name                                                  |                                                     |                                                                                                       |
| Type of media                                                |                                                     | e.g., 1=newspaper, 2=magazine, 3=radio, 4=TV, 4-blog/opinion piece, 4-wire news, 5=unclear/not stated |
| Test mentioned                                               | In the headline                                     | 1=Yes, 0=No                                                                                           |
|                                                              | In the body                                         | 1=Yes, 0=No                                                                                           |
| Mention of the health condition that the test is used for?   | Yes/No                                              | 1=Yes, (record condition)<br>0=No                                                                     |
| <b>Context about the screening test (benefits and harms)</b> |                                                     |                                                                                                       |
| <i>How benefit was described</i>                             |                                                     |                                                                                                       |
| Any benefit mentioned or implied?                            | Yes/No                                              | 1=Yes, 0=No                                                                                           |
| Any benefit quantified?                                      | Yes/No                                              | 1=Yes, (record how quantified)<br>0=No                                                                |
| Was anecdote or other real-life example of benefit given?    | Yes/No                                              | 1=Yes, 0=No                                                                                           |
|                                                              | Anecdote                                            | 1=Yes, 0=No                                                                                           |
|                                                              | Celebrity                                           | 1=Yes, 0=No                                                                                           |
|                                                              | Benefits referred to as revolutionary, life-saving, |                                                                                                       |

|                                                                             |                                                                                                                                             |                                           |
|-----------------------------------------------------------------------------|---------------------------------------------------------------------------------------------------------------------------------------------|-------------------------------------------|
|                                                                             | breakthrough, leading to improved treatment                                                                                                 |                                           |
| <b>How harm was described</b>                                               |                                                                                                                                             |                                           |
| Any harm mentioned or implied?                                              |                                                                                                                                             | 1=Yes, 0=No                               |
| Any harm quantified?                                                        |                                                                                                                                             | 1=Yes, (record how quantified)<br>0=No    |
| Was anecdote or other real-life example of harm given?                      | Yes/No                                                                                                                                      | 1=Yes, 0=No                               |
|                                                                             | Anecdote                                                                                                                                    | 1=Yes, 0=No                               |
|                                                                             | Celebrity                                                                                                                                   | 1=Yes, 0=No                               |
|                                                                             | Any specific harms of screening mentioned? (e.g. overdiagnosis, potential overtreatment)                                                    | 1=Yes, (record specific harm)<br><br>0=No |
| <b>Evidence of conflicts of interest</b>                                    |                                                                                                                                             |                                           |
| Any specific scientific study quoted or mentioned about the screening test? | Yes/No                                                                                                                                      | 1=Yes, 0=No                               |
|                                                                             | Does the scientific study disclose any financial ties of the authors to the manufacturers of the screening test discussed in story?         | 1=Yes, 0=No<br>If yes, state verbatim     |
|                                                                             | Did the media story include information about financial ties of the authors to the manufacturer of the screening test? (if relevant)        | 1= Yes, 0=No                              |
|                                                                             | Does the scientific study mention receipt of study funding from the manufacturers of the screening test discussed in story?                 | 1= Yes, 0=No                              |
|                                                                             | Did the media story include information about receipt of study funding from the manufacturers of the relevant screening test? (if relevant) | 1= Yes, 0=No                              |
|                                                                             | Other sources quoted or mentioned about the screening test                                                                                  | Yes/No                                    |
| Physician/provider?                                                         |                                                                                                                                             | 1= Yes, 0=No                              |
| Patient quoted?                                                             |                                                                                                                                             | 1= Yes, 0=No                              |
| Other source?                                                               |                                                                                                                                             | 1= Yes, 0=No                              |

| Overall impressions/tone                                                                                                                                             |  |                                                                                                                                     |
|----------------------------------------------------------------------------------------------------------------------------------------------------------------------|--|-------------------------------------------------------------------------------------------------------------------------------------|
| Media story leaves you with sense that the screening test is                                                                                                         |  | 1=Beneficial overall<br>2= Harmful overall<br>3= Neutral (balanced information given about benefits and harms)<br>4= Unclear        |
| Overall tone about going for the screening test                                                                                                                      |  | 1= Overall positive (worth getting)<br>2= Overall negative (avoid it)<br>3= Neutral (balanced information about benefits and harms) |
| Paste in anything else unusual, interesting or any especially juicy quotes (including source) (e.g. screening tests being lifesaving, a breakthrough, revolutionary) |  | Leave a comment or paste here anything interesting (even quotes)                                                                    |

**Note:** This is a draft coding tool. The tool may be modified once the reviewers pilot test it with a sample of included media stories.

### Data analysis

Descriptive statistics (means, standard deviations (SD), counts and percentages) will be used to summarise the extracted data (e.g. number of stories, number of countries, number reporting benefits and harms, etc.). Analysis will be performed separately for each test. Categorical data analysis will be used to investigate potential associations between overall impression of the media reports and explanatory variables including conflicts of interest, time, and type of media. We plan to use multinomial logistic regression where the dependent variable is overall impression and a neutral impression is the reference category. We will report odds ratios and 95% confidence intervals for negative impressions and positive impressions associated with the independent explanatory variables (as referred to above). Analysis will be conducted separately for each test. We will use chi-square tests to compare the distribution of categories of overall impressions across the 5 tests. We will also outline at least one example of a media story for each test in the results section.

### Ethical considerations

No ethical approval is required for this study.

### Patient or Public Involvement

Patients and members of the public were not involved in the design of this study.

## Dissemination

The results of this study will be published and presented at relevant medical conferences. We anticipate the results of this study will inform the development of an intervention to improve the quality of medical reporting in the media.

## Discussion

This study will examine media coverage reporting the benefits and harms of five medical tests that are controversially being promoted to the healthy. While other drivers, including research and professional prominence given to early detection,<sup>2</sup> are important, sustained media coverage is likely a powerful source of influence of public attitudes towards new tests. The results will provide valuable information about the quality of media reporting on tests targeting the healthy and inform interventions to improve the quality of medical reporting.

Peer review only

## References:

1. Grimes DA, Schulz KF. Uses and abuses of screening tests. *The Lancet* 2002;359(9309):881-84.
2. Hofmann B, Skolbekken J-A. Surge in publications on early detection. *BMJ* 2017;357:j2102. doi: 10.1136/bmj.j2102
3. Hunt S, Jha S. Can precision medicine reduce overdiagnosis? *Acad Radiol* 2015;22(8):1040-1.
4. Brodersen J, Kramer BS, Macdonald H, et al. Focusing on overdiagnosis as a driver of too much medicine. *BMJ* 2018;362:k3494.
5. Moynihan R, Doust J, Henry D. Preventing Overdiagnosis: how to stop harming the healthy. *BMJ* 2015;344:e3502.
6. Glasziou P, Moynihan R, Richards T, et al. Too much medicine; too little care. *BMJ* 2013;347:f4247.
7. Ahn HS, Kim HJ, Welch HG. Korea's thyroid-cancer "epidemic"—screening and overdiagnosis. *N Engl J Med* 2014;371(19):1765-67.
8. Vaccarella S, Franceschi S, Bray F, et al. Worldwide thyroid-cancer epidemic? The increasing impact of overdiagnosis. *N Engl J Med* 2016;375(7):614-17.
9. Bell KJ, Doust J, Glasziou P, et al. Recognizing the Potential for Overdiagnosis: Are High-Sensitivity Cardiac Troponin Assays an Example? *Ann Intern Med* 2019;170(4):259-61.
10. Carter SM, Degeling C, Doust J, et al. A definition and ethical evaluation of overdiagnosis. *J Med Ethics* 2016;42(11):705-14.
11. Pathirana T, Clark J, Moynihan R. Mapping the drivers of overdiagnosis to potential solutions. *BMJ* 2017;358:j3879.
12. Welch HG, Prorok PC, O'Malley AJ, et al. Breast-cancer tumor size, overdiagnosis, and mammography screening effectiveness. *N Engl J Med* 2016;375(15):1438-47.
13. Etzioni R, Penson DF, Legler JM, et al. Overdiagnosis due to prostate-specific antigen screening: lessons from US prostate cancer incidence trends. *J Natl Cancer Inst* 2002;94(13):981-90.
14. Bell KJ, Del Mar C, Wright G, et al. Prevalence of incidental prostate cancer: A systematic review of autopsy studies. *Int J Cancer* 2015;137(7):1749-57.
15. Niemantsverdriet E, Feyen BF, Le Bastard N, et al. Overdiagnosing vascular dementia using structural brain imaging for dementia work-up. *J Alzheimers Dis* 2015;45(4):1039-43.
16. Schmidt T, Maag R, Foy AJ. Overdiagnosis of coronary artery disease detected by coronary computed tomography angiography: a teachable moment. *JAMA Intern Med* 2016;176(12):1747-48.
17. Cotter AR, Vuong K, Mustelin LL, et al. Do psychological harms result from being labelled with an unexpected diagnosis of abdominal aortic aneurysm or prostate cancer through screening? A systematic review. *BMJ Open* 2017;7(12):e017565.
18. Nelson HD, Pappas M, Cantor A, et al. Harms of breast cancer screening: systematic review to update the 2009 US Preventive Services Task Force Recommendation. *Ann Intern Med* 2016;164(4):256-67.
19. DeFrank JT, Barclay C, Sheridan S, et al. The psychological harms of screening: the evidence we have versus the evidence we need. *J Gen Intern Med* 2015;30(2):242-48.
20. Welch HG, Passow HJ. Quantifying the benefits and harms of screening mammography. *JAMA Intern Med* 2014;174(3):448-54.
21. Prasad V, Lenzer J, Newman DH. Why cancer screening has never been shown to "save lives"—and what we can do about it. *BMJ* 2016;352:h6080.
22. Moynihan R, Nickel B, Hersch J, et al. Public opinions about overdiagnosis: a national community survey. *PLoS One* 2015;10(5):e0125165.



23. Ghanouni A, Meisel SF, Renzi C, et al. Survey of public definitions of the term ‘overdiagnosis’ in the UK. *BMJ Open* 2016;6(4)
24. Hoffmann TC, Del Mar C. Patients’ expectations of the benefits and harms of treatments, screening, and tests: a systematic review. *JAMA Intern Med* 2015;175(2):274-86.
25. Hoffmann TC, Del Mar C. Clinicians’ expectations of the benefits and harms of treatments, screening, and tests: a systematic review. *JAMA Intern Med* 2017;177(3):407-19.
26. Medew J, Moynihan R. Improving coverage of medical research in a changing media environment. *CMAJ* 2017;189(15):E551.
27. Moynihan R, Bero L, Ross-Degnan D, et al. Coverage by the news media of the benefits and risks of medications. *N Engl J Med* 2000;342(22):1645-50.
28. Cassels A, Hughes MA, Cole C, et al. Drugs in the news: an analysis of Canadian newspaper coverage of new prescription drugs. *CMAJ* 2003;168(9):1133-37.
29. Goldacre B. Preventing bad reporting on health research. *BMJ* 2014;349:g7465.
30. Almomani B, Hawwa AF, Goodfellow NA, et al. Pharmacogenetics and the print media: what is the public told? *BMC Med Genet* 2015;16(1):32.
31. Schwartz LM, Woloshin S, Moynihan R. Who's watching the watchdogs? *BMJ* 2008;337(9):a2535.
32. Moynihan R. Making medical journalism healthier. *The Lancet* 2003;361(9375):2097-98.
33. Wang MT, Grey A, Bolland MJ. Conflicts of interest and expertise of independent commenters in news stories about medical research. *CMAJ* 2017;189(15):E553-E59.
34. Chapman S, McLeod K, Wakefield M, et al. Impact of news of celebrity illness on breast cancer screening: Kylie Minogue's breast cancer diagnosis. *Med J Aust* 2005;183(5):247-50.
35. Walsh-Childers K, Braddock J. Competing with the conventional wisdom: newspaper framing of medical overtreatment. *Health Commun* 2014;29(2):157-72.
36. Hologic I. FDA Approves Hologic's Genius™ 3D Mammography™ Exam as the Only Mammogram Superior for Women with Dense Breasts\* 2017 [Available from: <https://www.prnewswire.com/news-releases/fda-approves-hologics-genius-3d-mammography-exam-as-the-only-mammogram-superior-for-women-with-dense-breasts-300469885.html>].
37. Healio. FDA approves 3-D mammography system 2011 [Available from: <https://www.healio.com/hematology-oncology/breast-cancer/news/print/hemonc-today/%7Ba61b1afa-4238-4b58-8f6a-f9298833f19b%7D/fda-approves-3-d-mammography-system>].
38. News IT. FDA Approves New Imaging Features on Hologic 3Dimensions Mammography System. 2018
39. Zackrisson S, Lång K, Rosso A, et al. One-view breast tomosynthesis versus two-view mammography in the Malmö Breast Tomosynthesis Screening Trial (MBTST): a prospective, population-based, diagnostic accuracy study. *Lancet Oncol* 2018;19(11):1493-503.
40. Marinovich ML, Hunter KE, Macaskill P, et al. Breast Cancer Screening Using Tomosynthesis or Mammography: A Meta-analysis of Cancer Detection and Recall. *J Natl Cancer Inst* 2018;110(9):942-49.
41. Barratt AL, Glasziou PP. Do the benefits of screening mammography outweigh the harms of overdiagnosis and unnecessary treatment? *Med J Aust* 2012;196(11):681.
42. Crowley E, Di Nicolantonio F, Loupakis F, et al. Liquid biopsy: monitoring cancer-genetics in the blood. *Nat Rev Clin Oncol* 2013;10(8):472.
43. US Food and Drug Administration (FDA). FDA approves first blood test to detect gene mutation associated with non-small cell lung cancer 2016 [Available from: <https://www.fda.gov/newsevents/newsroom/pressannouncements/ucm504488.htm>].

1  
2  
3  
4  
5  
6  
7  
8  
9  
10  
11  
12  
13  
14  
15  
16  
17  
18  
19  
20  
21  
22  
23  
24  
25  
26  
27  
28  
29  
30  
31  
32  
33  
34  
35  
36  
37  
38  
39  
40  
41  
42  
43  
44  
45  
46  
47  
48  
49  
50  
51  
52  
53  
54  
55  
56  
57  
58  
59  
60

44. Medicine F. Foundation Medicine's New Liquid Biopsy Assay Granted Breakthrough Device Designation by U.S. Food and Drug Administration 2018 [Available from: <http://investors.foundationmedicine.com/news-releases/news-release-details/foundation-medicines-new-liquid-biopsy-assay-granted>].
45. Kaiser J. 'Liquid biopsy' for cancer promises early detection. *Science* 2018;359(6373):259-59. doi: 10.1126/science.359.6373.259
46. Merker JD, Oxnard GR, Compton C, et al. Circulating Tumor DNA Analysis in Patients With Cancer: American Society of Clinical Oncology and College of American Pathologists Joint Review. *J Clin Oncol* 2018;36(16):1631-41.
47. Palmirotta R, Lovero D, Cafforio P, et al. Liquid biopsy of cancer: a multimodal diagnostic tool in clinical oncology. *Ther Adv Med Oncol* 2018;10:1758835918794630-30.
48. Kato S, Lippman SM, Flaherty KT, et al. The conundrum of genetic "drivers" in benign conditions. *J Natl Cancer Inst* 2016;108(8):djw036.
49. Gormally E, Vineis P, Matullo G, et al. TP53 and KRAS2 mutations in plasma DNA of healthy subjects and subsequent cancer occurrence: a prospective study. *Cancer Res* 2006;66(13):6871-76.
50. Ritchie C, Smailagic N, Noel-Storr AH, et al. CSF tau and the CSF tau/ABeta ratio for the diagnosis of Alzheimer's disease dementia and other dementias in people with mild cognitive impairment (MCI). *Cochrane Database Syst Rev* 2017;3:CD010803.
51. Chambers LW, Sivananthan S, Brayne C. Is Dementia Screening of Apparently Healthy Individuals Justified? *Adv Prev Med* 2017
52. 23andMe I. 23andMe, Inc. Granted First FDA Authorization to Market Direct-to-Consumer Genetic Health Risk Reports 2017 [Available from: <https://mediacenter.23andme.com/press-releases/23andme-inc-granted-first-fda-authorization-market-direct-consumer-genetic-health-risk-reports/>].
53. McCleery J, Flicker L, Richard E, et al. The National Institute on Aging and Alzheimer's Association research framework: A commentary from the Cochrane Dementia and Cognitive Improvement Group. *Alzheimers Dement* 2019;15(1):179-81.
54. Brunet M. Targets for dementia diagnoses will lead to overdiagnosis. *BMJ* 2014;348:g2224.
55. Schneider JA, Arvanitakis Z, Bang W, et al. Mixed brain pathologies account for most dementia cases in community-dwelling older persons. *Neurology* 2007;69(24):2197-204.
56. Bemelmans S, Tromp K, Bunnik E, et al. Psychological, behavioral and social effects of disclosing Alzheimer's disease biomarkers to research participants: a systematic review. *Alzheimer's Research & Therapy* 2016;8(1):46.
57. Noel-Storr AH, Flicker L, Ritchie CW, et al. Systematic review of the body of evidence for the use of biomarkers in the diagnosis of dementia. *Alzheimer's & Dementia* 2013;9(3):e96-e105.
58. Verghese A, Shah NH, Harrington RA. What this computer needs is a physician: humanism and artificial intelligence. *JAMA* 2018;319(1):19-20.
59. Icometrix. FDA clears icometrix' image quantification software to monitor neurological disorders 2016 [Available from: <https://www.prnewswire.com/news-releases/fda-clears-icomatrix-image-quantification-software-to-monitor-neurological-disorders-300322995.html>].
60. Komorowski M, Celi LA. Will Artificial Intelligence Contribute to Overuse in Healthcare? *Crit Care Med* 2017;45(5):912-13.
61. Owen M. Apple Watch Series 4 is first consumer device to receive FDA clearance for ECG monitoring 2018 [Available from: <https://appleinsider.com/articles/18/09/12/apple-watch-series-4-is-first-consumer-device-to-receive-fda-clearance-for-ecg-monitoring>].

- 1
- 2
- 3
- 4
- 5 62. Go AS, Reynolds K, Yang J, et al. Association of burden of atrial fibrillation with risk of ischemic
- 6 stroke in adults with paroxysmal atrial fibrillation: The kp-rhythm study. *JAMA Cardiol*
- 7 2018;3(7):601-08.
- 8 63. Brieger D, Amerena J, Attia J, et al. National Heart Foundation of Australia and the Cardiac
- 9 Society of Australia and New Zealand: Australian Clinical Guidelines for the Diagnosis and
- 10 Management of Atrial Fibrillation 2018. *Heart Lung Circ* 2018;27(10):1209-66.
- 11 64. Chen LY, Chung MK, Allen LA, et al. Atrial fibrillation burden: moving beyond atrial fibrillation
- 12 as a binary entity: a scientific statement from the American Heart Association. *Circulation*
- 13 2018;137(20):e623-e44.
- 14 65. Mandrola J. Overdiagnosis Only a Matter of Time With ECG Watches 2017 [Available from:
- 15 <https://www.medscape.com/viewarticle/889753>.
- 16 66. Mandrola J, Foy A, Naccarelli G. Screening for atrial fibrillation comes with many snags. *JAMA*
- 17 *Intern Med* 2018;178(10):1296-98.
- 18 67. Mandrola J, Foy A. Downsides of Detecting Atrial Fibrillation in Asymptomatic Patients. *Am*
- 19 *Fam Physician* 2019;99(6):354-55.
- 20 68. Svennberg E, Engdahl J, Al-Khalili F, et al. Mass screening for untreated atrial fibrillation: the
- 21 STROKESTOP study. *Circulation* 2015;131(25):2176-84.
- 22 69. Steinhubl SR, Waalen J, Edwards AM, et al. Effect of a home-based wearable continuous ECG
- 23 monitoring patch on detection of undiagnosed atrial fibrillation: the mSToPS randomized
- 24 clinical trial. *JAMA* 2018;320(2):146-55.
- 25 70. Woloshin S, Schwartz LM, Dejene S, et al. Media Coverage of FDA Drug Safety
- 26 Communications about Zolpidem: A Quantitative and Qualitative Analysis. *J Health*
- 27 *Commun* 2017;22(5):365-72.
- 28 71. Harris PA, Taylor R, Thielke R, et al. Research electronic data capture (REDCap)—a metadata-
- 29 driven methodology and workflow process for providing translational research informatics
- 30 support. *J Biomed Inform* 2009;42(2):377-81.
- 31 72. Moynihan R, Clark J, L A. Media coverage of the benefits and harms of the 2017 expanded
- 32 definition of hypertension. *JAMA Intern Med* 2018
- 33
- 34
- 35
- 36
- 37
- 38
- 39
- 40
- 41
- 42
- 43
- 44
- 45
- 46
- 47
- 48
- 49
- 50
- 51
- 52
- 53
- 54
- 55
- 56
- 57
- 58
- 59
- 60

1  
2  
3  
4  
5  
6  
7  
8  
9  
10  
11  
12  
13  
14  
15  
16  
17  
18  
19  
20  
21  
22  
23  
24  
25  
26  
27  
28  
29  
30  
31  
32  
33  
34  
35  
36  
37  
38  
39  
40  
41  
42  
43  
44  
45  
46  
47  
48  
49  
50  
51  
52  
53  
54  
55  
56  
57  
58  
59  
60

**Acknowledgement:** We would like to thank Professor Andrew D. Oxman (Centre for Informed Health Choices, Norwegian Institute of Public Health, Oslo, Norway and University of Oslo, Oslo, Norway) for providing feedback on an earlier draft of this protocol.

**Authors' contributions:** MOK, RM, AB, and CM have been primarily responsible for study conception, design, and designing the data coding approach. MJ advised on statistical analysis. JZ and AF helped pilot the search strategy and coding tool. MOK drafted the first version of this manuscript. All authors provided critical evaluation and revision of the manuscript and had given final approval of the manuscript accepting responsibility for all aspects.

**Funding statement:** This study will not receive any specific funding. MOK is supported by a European Union Marie Skłodowska-Curie postdoctoral fellowship. AB and RM are investigators on a National Health and Medical Research Council of Australia (NHMRC) funded CRE grant No.1104136. RM is supported by an NHMRC grant, #1124207. AF is a post-doctoral fellow on an Australian NHMRC project grant no.1122332. CGM is supported by an Australian NMHRC Research Fellowship. This specific study received no specific grant from any funding agency in public, commercial or not-for-profit sectors.

**Competing interests statement:** None to declare
